# Supplementary material for: Genome-wide association study of caffeine metabolites provides new insights to caffeine metabolism and dietary caffeine-consumption behavior
Source: Oxford University Press journal article supplement (doi:10.1093/hmg/ddw334), 2016-09-29
Supplement: ddw334_Supp.zip [file ddw334_Supp.zip]

## SUPPLEMENTARY INFORMATION

### **Genome-wide association study of caffeine metabolites provides new insights to caffeine metabolism and dietary caffeine-consumption behavior**

#### SUPPLEMENTARY MATERIAL AND METHODS

##### **Study samples**

*Prospective Study of the Vasculature in Uppsala Seniors (PIVUS)* (1): All 70-year-old individuals living in Uppsala, Sweden were eligible for PIVUS, and 2,025 randomly selected individuals were invited within 2 months of their 70<sup>th</sup> birthday from April 2001 to June 2004. Of these, 1,016 participated in the study and provided an overnight fasting blood sample at the baseline examination. Plasma metabolite data for up to 914 individuals passed the quality control (QC) process and were included in the current study.

*Study of Health in Pomerania (SHIP)* (2): SHIP-TREND is a second cohort of a population-based research project in West Pomerania, a rural region in north-east Germany. Initially, 8826 subjects were selected from population registries and 4420 choose to participate in the baseline examination between 2009 and 2012. For a subsample of 1000 subjects without self-reported diabetes, plasma as well as urine metabolomics data based on mass spectrometry were acquired. For this purpose fasting (>8h) plasma samples were drawn prior to noon and spot urine samples were collected in the same time frame. After application of exclusion criteria (i.e. pertaining to trait definitions and covariate data; see main text) up to 957 participants were available for the present analyses.

*Swiss Kidney Project on Genes in Hypertension (SKIPOGH)* (3, 4): SKIPOGH is a family and population-based cross-sectional study nested within the larger family-based international European Project on Genes in Hypertension (EPOGH) study (5). SKIPOGH included 1,128 participants from 273 nuclear families recruited in the cantons of Bern and Geneva and the city of Lausanne between 2009 and 2013. Participants attended study centers in the morning where blood samples were collected after an overnight fast. Participants were also asked

to collect a 24-hour urine sample, with separate day and night collections, for the measurement of urinary volume and electrolytes. Up to 833 of these participants had genotyped data approved for analysis at the time the current study was initiated.

*TwinGene* (6). The TwinGene project, conducted between 2004 and 2008, is a population-based Swedish study of twins born between 1911 and 1958 (7). In total, 12,591 individuals participated by donating blood to the study, and by answering questionnaires about life style and health. The subset of TwinGene with metabolomics includes 2,141 members with metabolites and is a case-cohort design enriched with incident coronary heart disease, stroke, diabetes, and dementia events(8). After application of exclusion criteria (i.e. pertaining to trait definitions and covariate data; see main text) up to 1609 participants were available for the present analyses.

*TwinsUK*: The TwinsUK cohort began in 1992 and is an adult twin British registry recruited from the general population in the United Kingdom (9). Participants are similar to age-matched singleton members of the general population in disease-related and lifestyle characteristics (10). The 4555 participants included in the current study had the required metabolite, GWAS and covariate data. Blood samples were collected after at least 6 hours of fasting predominantly overnight.

*Uppsala Longitudinal Study of Adult Men (ULSAM)* (11): ULSAM began in 1970, when all men 50 years of age and born between 1920 and 1924 in Uppsala, Sweden were invited to participate (2,322 participated of 2,841 invited). Subjects underwent a clinical exam and routine medical history and lifestyle assessment at the ages of 60, 70, 77, 82 and 88 years. After application of exclusion criteria (i.e. pertaining to trait definitions and covariate data; see main text) up to 1039 participants were available for the present analyses.

Table S1. Metabolites Examined in the Current Study

| Common names                         | IUPAC Name                                                                                  | Abbreviation | Relevance to current study                                                   |
|--------------------------------------|---------------------------------------------------------------------------------------------|--------------|------------------------------------------------------------------------------|
| caffeine<br>1,3,7-trimethylxanthine  | 1,3,7-trimethyl-2,3,6,7-tetrahydro-1H-purine-2,6-dione                                      | 137X         | target exposure                                                              |
| paraxanthine<br>1,7-dimethylxanthine | 1,7-dimethyl-2,3,6,7-tetrahydro-1H-purine-2,6-dione                                         | 17X          | primary caffeine metabolite (major)                                          |
| theophylline<br>1,3-dimethylxanthine | 1,3-dimethyl-2,3,6,7-tetrahydro-1H-purine-2,6-dione                                         | 13X          | primary caffeine metabolite                                                  |
| theobromine<br>3,7-dimethylxanthine  | 3,7-dimethyl-2,3,6,7-tetrahydro-1H-purine-2,6-dione                                         | 37X          | primary caffeine metabolites                                                 |
| 1,3,7-trimethyluric acid             | 1,3,7-trimethyl-2,3,6,7,8,9-hexahydro-1H-purine-2,6,8-trione                                | 137U         | primary caffeine metabolite (minor)                                          |
| 1,7-dimethyluric acid                | 1,7-dimethyl-2,3,6,7,8,9-hexahydro-1H-purine-2,6,8-trione                                   | 17U          | 17X metabolite                                                               |
| 1,3-dimethyluric acid                | 1,3-dimethyl-2,3,6,7,8,9-hexahydro-1H-purine-2,6,8-trione                                   | 13U          | 13X metabolite                                                               |
| 3,7-dimethyluric acid                | 3,7-dimethyl-2,3,6,7,8,9-hexahydro-1H-purine-2,6,8-trione                                   | 37U          | 37X metabolite                                                               |
| trigonelline                         | 1-methylpyridin-1-ium-3-carboxylate                                                         | Trig         | a potential but non-specific coffee-derived biomarker of coffee consumption. |
| quinine                              | (R)-[(1S,2S,4S,5R)-5-ethenyl-1-azabicyclo[2.2.2]octan-2-yl](6-methoxyquinolin-4-yl)methanol | QN           | a potential but non-specific coffee-derived biomarker of coffee consumption. |

Table S2. Description of Studies Participating in GWAS of Plasma Caffeine Metabolites

| Study                                                           | Sample size (N) per Plasma Metabolite |                  |                  |                  |      |                  | Participant Characteristics<br>(based on max N) |              |                          | Biospecimen Collection |                |                   | Metabolite Assays and Data processing                                           |      |                                                                             |
|-----------------------------------------------------------------|---------------------------------------|------------------|------------------|------------------|------|------------------|-------------------------------------------------|--------------|--------------------------|------------------------|----------------|-------------------|---------------------------------------------------------------------------------|------|-----------------------------------------------------------------------------|
|                                                                 | 137X                                  | 17X              | 13X              | 37X              | 137U | 17X/137X         | Age,<br>years<br>(SD)                           | Female,<br>% | Current<br>Smoking,<br>% | Year                   | Time of<br>day | Fasting<br>status | Platform                                                                        | CV%  | Normalization<br>(prior to<br>standardization)                              |
| Prospective Study of the Vasculature in Uppsala Seniors (PIVUS) | 910                                   |                  |                  | 902              | 914  |                  | 70.1<br>(0.2)                                   | 50           | 10                       | 2001-2004              | 8 am to 10 am  | Overnight         | UPLC-MS/MS (Waters)                                                             | 3    | rank-based inverse-normal transformation                                    |
| Study of Health in Pomerania TREND (SHIP-TREND)                 | 951                                   | 952              | 860              | 957              |      | 943              | 50.1<br>(14)                                    | 56           | 22                       | 2008                   | 7 am to 11 am  | > 8 h             | UPLC-ESI-MS/MS (Waters ACQUITY UPLC and Thermo Scientific LTQ XL MS; Helmholtz) |      | Day-median normalized and log <sub>10</sub> transformed                     |
| Swiss Kidney Project on Genes in Hypertension (SKIPOGH)         | 822 <sup>a</sup>                      | 833 <sup>a</sup> | 826 <sup>a</sup> | 824 <sup>a</sup> |      | 824 <sup>a</sup> | 47.5<br>(17)                                    | 52           | 24                       | 2009                   | Morning        | Overnight         | UPLC-ESI-MS/MS (Waters ACQUITY UPLC and TQD)                                    | 9-23 | Square-root (single metabolites) or log (metabolite ratios) transformation. |
| TwinGene                                                        | 1600                                  |                  |                  | 1599             | 1609 |                  | 68.7<br>(8)                                     | 40           | 15                       | 2004-2008              | Morning        | mixed             | UPLC-MS/MS (Waters)                                                             | 4    | rank-based inverse-normal transformation                                    |
| TwinsUK                                                         | 4555                                  | 4401             | 4401             | 4551             |      | 4380             | 53.4<br>(14)                                    | 93           | 17                       | 1996-2010              | 8 am to 11 am  | > 8 h             | UPLC-ESI-MS/MS (Waters ACQUITY UPLC and Thermo Scientific LTQ XL MS; Metabolon) | 9-19 | Day-median normalized                                                       |

|                                                             |      |  |  |  |      |  |               |   |    |               |         |           |                            |   |                                                |
|-------------------------------------------------------------|------|--|--|--|------|--|---------------|---|----|---------------|---------|-----------|----------------------------|---|------------------------------------------------|
| Uppsala<br>Longitudinal<br>Study of<br>Adult Men<br>(ULSAM) | 1038 |  |  |  | 1039 |  | 71.0<br>(0.6) | 0 | 20 | 1991-<br>1995 | unknown | Overnight | UPLC-<br>MS/MS<br>(Waters) | 5 | rank-based<br>inverse-normal<br>transformation |
|-------------------------------------------------------------|------|--|--|--|------|--|---------------|---|----|---------------|---------|-----------|----------------------------|---|------------------------------------------------|

<sup>a</sup>max N (varied due to call rate).

Table S2 (cont'd). Description of Studies Participating in GWAS of plasma caffeine and its metabolites

| Study      | Genotyping                                     |                        |                                        |                     |                           |                                                                                                                                                                                                | Imputation |                        |                |
|------------|------------------------------------------------|------------------------|----------------------------------------|---------------------|---------------------------|------------------------------------------------------------------------------------------------------------------------------------------------------------------------------------------------|------------|------------------------|----------------|
|            | Platform                                       | SNP Exclusion Criteria |                                        |                     | Sample exclusion criteria |                                                                                                                                                                                                | Software   | Reference panel        | Quality filter |
|            |                                                | MAF                    | Call rate                              | P HWE               | Call rate                 | Other                                                                                                                                                                                          |            |                        |                |
| PIVUS      | Illumina HumanOmniExpress                      | <1%                    | ≤95% (MAF ≥5%)<br>or<br>≤99% (MAF <5%) | ≤1×10 <sup>-6</sup> | <95%                      | -                                                                                                                                                                                              | Impute     | 1000G, ALL, March 2012 | 0.4            |
| SHIP-TREND | Illumina HumanOmni 2.5-4v1                     | mono                   | ≤90%                                   | ≤1×10 <sup>-4</sup> | ≤94%                      | Sex discrepancies, duplicates, missing phenotype data, consent withdrawn                                                                                                                       | Impute     | 1000G, ALL, March 2012 | 0.4            |
| SKIPOGH    | Metabochip                                     | <2%                    | ≤98%                                   | ≤1×10 <sup>-5</sup> | <93%                      | Duplicates, missing phenotype data                                                                                                                                                             | n/a        | n/a                    | n/a            |
| TwinGene   | Illumina HumanOmniExpress                      | <1%                    | ≤97%                                   | ≤1×10 <sup>-7</sup> | <97%                      | -                                                                                                                                                                                              | minimac    | 1000G, ALL, March 2012 | 0.4            |
| TwinsUK    | HumanHap300, HumanHap610Q, 1M-Duo, and 1.2MDuo | <1%                    | ≤97% (MAF ≥5%)<br>or<br>≤99% (MAF <5%) | ≤1×10 <sup>-6</sup> | <98%                      | Sex discrepancies, duplicates, missing phenotype data, heterozygosity across all SNPs ≥2 SD from the sample mean, evidence of non-European ancestry as assessed by PCA comparison with HapMap3 | Impute     | 1000G, ALL, March 2012 | 0.4            |
| ULSAM      | Illumina HumanOmni 2.5 M                       | <1%                    | ≤95% (MAF ≥5%)<br>or<br>≤99% (MAF <5%) | ≤1×10 <sup>-6</sup> | <95%                      | -                                                                                                                                                                                              | Impute     | 1000G, ALL, March 2012 | 0.4            |

Table S2 (cont'd). Description of Studies Participating in GWAS of plasma caffeine and its metabolites

| Study      | Statistical Analysis |                                                                                                                              |                                                                                    |                                      | Ref      |
|------------|----------------------|------------------------------------------------------------------------------------------------------------------------------|------------------------------------------------------------------------------------|--------------------------------------|----------|
|            | Software             | Model covariates                                                                                                             | SNPs in meta-analyses                                                              | $\lambda_{GC}$                       |          |
| PIVUS      | SNPTEST              | Age, sex, smoking status, first 2 ancestry components                                                                        | 137X: 8478315<br>37X: 8485503<br>137U: 8478524                                     | 0.99<br>1.00<br>1.02                 | (8, 12)  |
| SHIP-TREND | Quicktest            | Sex, age, smoking status, fasting time<br><br>*no evidence for population stratification in SHIP, thus no adjustment for PCs | 137X: 8512980<br>17X: 8512549<br>13X: 8514178<br>37X: 8513269<br>17X/137X: 8523123 | 0.99<br>1.00<br>1.00<br>1.01<br>1.01 | (2, 13)  |
| SKIPOGH    | PLINK                | Sex, age, smoking status, center                                                                                             | 137X: 113869<br>17X: 113874<br>13X: 113874<br>37X: 113869<br>17X/137X: 113874      | 1.09<br>1.09<br>1.10<br>1.15<br>1.18 | (14, 15) |
| TwinGene   | SNPTEST              | Age, sex, smoking status, first 4 ancestry components                                                                        | 137X: 8198215<br>37X: 8198854<br>137U: 8197082                                     | 1.01<br>1.01<br>1.00                 | (8, 12)  |
| TwinsUK    | GEMMA (V0.94.1)      | Sex, age, smoking status, BMI, metabolite batch                                                                              | 137X: 8373143<br>17X: 8373133<br>13X: 8372834<br>37X: 8373040<br>17X/137X: 8373236 | 1.01<br>1.00<br>1.00<br>1.01<br>1.00 | (16)     |
| ULSAM      | SNPTEST              | Age, smoking status, first 2 ancestry components                                                                             | 137X: 8558034<br>137U: 8558125                                                     | 0.99<br>0.98                         | (8, 12)  |

Table S3. Studies Contributing to Follow-up SNP-Metabolite Analysis

| Metabolite     | SHIP-TREND | SKIPOGH | TwinsUK |
|----------------|------------|---------|---------|
| <b>Plasma*</b> |            |         |         |
| 17U            | 695        |         |         |
| Trig           | 880        |         |         |
| QN             |            |         | 3634    |
| 13X/137X       | 851        |         |         |
| 37X/137X       | 944        |         |         |
| 17U/17X        | 689        |         |         |
| 137X/Trig      | 870        |         |         |
| 137/QN         |            |         | 3573    |
| <b>Urine†</b>  |            |         |         |
| 137X           | 819        | 771     |         |
| 17X            | 959        | 777     |         |
| 13X            | 906        | 775     |         |
| 37X            | 961        | 775     |         |
| 137U           | 940        |         |         |
| 17U            | 967        |         |         |
| 13U            | 946        |         |         |
| 37U            | 895        |         |         |
| 17X/137X       | 814        |         |         |
| 13X/137X       | 806        |         |         |
| 37X/137X       | 807        |         |         |
| 17U/17X        | 957        |         |         |
| 13U/13X        | 898        |         |         |
| 37U/37X        | 888        |         |         |

\*See Table S2 for plasma metabolite methods

†SHIP-TREND: Fasting, cross-sectional urine collection. UPLC-ESI-MS/MS metabolite measurement (see Table S2). Day-median and creatinine normalized.

SKIPOGH: 24 hour urine UPLC-ESI-MS/MS (Waters ACQUITY UPLC I-Class and Xevo TQ-S). Prior to standardization, metabolites were square root transformed and ratios were log-transformed.



## Supplementary References

- 1 Lind, L., Fors, N., Hall, J., Marttala, K. and Stenborg, A. (2005) A comparison of three different methods to evaluate endothelium-dependent vasodilation in the elderly: the Prospective Investigation of the Vasculature in Uppsala Seniors (PIVUS) study. *Arterioscler Thromb Vasc Biol*, **25**, 2368-2375.
- 2 Volzke, H., Alte, D., Schmidt, C.O., Radke, D., Lohr, R., Friedrich, N., Aumann, N., Lau, K., Piontek, M., Born, G. *et al.* (2011) Cohort profile: the study of health in Pomerania. *Int J Epidemiol*, **40**, 294-307.
- 3 Pruijm, M., Ponte, B., Ackermann, D., Vuistiner, P., Paccaud, F., Guessous, I., Ehret, G., Eisenberger, U., Mohaupt, M., Burnier, M. *et al.* (2013) Heritability, determinants and reference values of renal length: a family-based population study. *European radiology*, **23**, 2899-2905.
- 4 Ponte, B., Pruijm, M., Ackermann, D., Vuistiner, P., Eisenberger, U., Guessous, I., Rousson, V., Mohaupt, M.G., Alwan, H., Ehret, G. *et al.* (2014) Reference values and factors associated with renal resistive index in a family-based population study. *Hypertension*, **63**, 136-142.
- 5 Kuznetsova, T., Staessen, J.A., Kawecka-Jaszcz, K., Babeanu, S., Casiglia, E., Filipovsky, J., Nachev, C., Nikitin, Y., Peleska, J. and O'Brien, E. (2002) Quality control of the blood pressure phenotype in the European Project on Genes in Hypertension. *Blood pressure monitoring*, **7**, 215-224.
- 6 Magnusson, P.K., Almqvist, C., Rahman, I., Ganna, A., Viktorin, A., Walum, H., Halldner, L., Lundstrom, S., Ullen, F., Langstrom, N. *et al.* (2013) The Swedish Twin Registry: establishment of a biobank and other recent developments. *Twin Res Hum Genet*, **16**, 317-329.
- 7 Lichtenstein, P., Sullivan, P.F., Cnattingius, S., Gatz, M., Johansson, S., Carlstrom, E., Bjork, C., Svartengren, M., Wolk, A., Klareskog, L. *et al.* (2006) The Swedish Twin Registry in the third millennium: an update. *Twin Res Hum Genet*, **9**, 875-882.

- 8 Ganna, A., Fall, T., Salihovic, S., Lee, W., Broeckling, C.D., Kumar, J., Hägg, S., Stenemo, M., Magnusson, P.K. and Prezzi, J.E. (2016) Large-scale non-targeted metabolomic profiling in three human population-based studies. *Metabolomics*, **12**, 1-13.
- 9 Moayyeri, A., Hammond, C.J., Valdes, A.M. and Spector, T.D. (2013) Cohort Profile: TwinsUK and healthy ageing twin study. *Int J Epidemiol*, **42**, 76-85.
- 10 Andrew, T., Hart, D.J., Snieder, H., de Lange, M., Spector, T.D. and MacGregor, A.J. (2001) Are twins and singletons comparable? A study of disease-related and lifestyle characteristics in adult women. *Twin research : the official journal of the International Society for Twin Studies*, **4**, 464-477.
- 11 Ingelsson, E., Sundstrom, J., Arnlov, J., Zethelius, B. and Lind, L. (2005) Insulin resistance and risk of congestive heart failure. *JAMA*, **294**, 334-341.
- 12 Ganna, A., Salihovic, S., Sundstrom, J., Broeckling, C.D., Hedman, A.K., Magnusson, P.K., Pedersen, N.L., Larsson, A., Siegbahn, A., Zilmer, M. *et al.* (2014) Large-scale metabolomic profiling identifies novel biomarkers for incident coronary heart disease. *PLoS Genet*, **10**, e1004801.
- 13 Evans, A.M., DeHaven, C.D., Barrett, T., Mitchell, M. and Milgram, E. (2009) Integrated, nontargeted ultrahigh performance liquid chromatography/electrospray ionization tandem mass spectrometry platform for the identification and relative quantification of the small-molecule complement of biological systems. *Anal Chem*, **81**, 6656-6667.
- 14 Voight, B.F., Kang, H.M., Ding, J., Palmer, C.D., Sidore, C., Chines, P.S., Burt, N.P., Fuchsberger, C., Li, Y., Erdmann, J. *et al.* (2012) The metabochip, a custom genotyping array for genetic studies of metabolic, cardiovascular, and anthropometric traits. *PLoS Genet*, **8**, e1002793.
- 15 Guessous, I., Pruijm, M., Ponte, B., Ackermann, D., Ehret, G., Ansermot, N., Vuistiner, P., Staessen, J., Gu, Y., Paccaud, F. *et al.* (2015) Associations of ambulatory blood pressure with urinary caffeine and caffeine metabolite excretions. *Hypertension*, **65**, 691-696.

- 16 Shin, S.Y., Fauman, E.B., Petersen, A.K., Krumsiek, J., Santos, R., Huang, J., Arnold, M., Erte, I., Forgetta, V., Yang, T.P. *et al.* (2014) An atlas of genetic influences on human blood metabolites. *Nat Genet*, **46**, 543-550.

Table S4. Candidate SNP-Metabolite Associations

| Main.Tables | rsID        | Chr | Position | EA | NEA | EAF  | 137X <sup>a</sup> |       |                 |                | 17X  |       |                 |                | 13X  |        |                 |                | 37X  |       |          |                | 137U |       |          |                | 17X/137X |       |                 |                |
|-------------|-------------|-----|----------|----|-----|------|-------------------|-------|-----------------|----------------|------|-------|-----------------|----------------|------|--------|-----------------|----------------|------|-------|----------|----------------|------|-------|----------|----------------|----------|-------|-----------------|----------------|
|             |             |     |          |    |     |      | N                 | Z     | P               | İ <sup>2</sup> | N    | Z     | P               | İ <sup>2</sup> | N    | Z      | P               | İ <sup>2</sup> | N    | Z     | P        | İ <sup>2</sup> | N    | Z     | P        | İ <sup>2</sup> | N        | Z     | P               | İ <sup>2</sup> |
| 2           | rs1260326   | 2   | 27730940 | T  | C   | 0.38 | 9876              | 2.49  | 0.01            | 0.7            | 6204 | -0.66 | 0.51            | 0              | 6090 | 0.883  | 0.38            | 60.8           | 8836 | 1.77  | 0.08     | 28.3           | 3562 | 0.05  | 0.96     | 0              | 6147     | -4.69 | 2.72E-06        | 66.3           |
| 2           | rs1481012   | 4   | 89039082 | A  | G   | 0.90 | 9054              | 2.72  | 0.01            | 0              | 5371 | 2.82  | 4.87E-03        | 0              | 5261 | 3.65   | 2.6E-04         | 9.1            | 8009 | 0.55  | 0.59     | 0              | 3562 | -0.39 | 0.70     | 12.8           | 5323     | -1.77 | 0.08            | 0              |
| 2           | rs7800944   | 7   | 73035857 | T  | C   | 0.71 | 9054              | 1.20  | 0.23            | 0              | 5371 | -0.20 | 0.84            | 0              | 5261 | 0.258  | 0.80            | 51.5           | 8009 | 0.87  | 0.38     | 0              | 3562 | -0.30 | 0.76     | 0              | 5323     | -1.91 | 0.06            | 0              |
| 2           | rs17685     | 7   | 75616105 | A  | G   | 0.28 | 9054              | -2.95 | 3.20E-03        | 66.5           | 5371 | -1.87 | 0.06            | 85.9           | 5261 | -1.076 | 0.28            | 62.8           | 8009 | -1.63 | 0.10     | 29.8           | 3562 | 0.25  | 0.80     | 0              | 5323     | 1.70  | 0.09            | 0              |
| 2           | rs6265      | 11  | 27679916 | T  | C   | 0.19 | 9876              | 0.44  | 0.66            | 0              | 6204 | 0.06  | 0.95            | 0              | 6090 | -0.213 | 0.83            | 0              | 8836 | -0.54 | 0.59     | 0              | 3562 | -0.58 | 0.56     | 0              | 6147     | 1.35  | 0.18            | 0              |
| 2           | rs9902453   | 17  | 28349095 | A  | G   | 0.54 | 9054              | 0.11  | 0.91            | 0              | 5371 | -1.63 | 0.10            | 0              | 5261 | 0.351  | 0.73            | 0              | 8009 | -0.60 | 0.55     | 0              | 3562 | 0.51  | 0.61     | 54.1           | 5323     | -0.92 | 0.36            | 36.9           |
| 1,2         | rs62391270  | 6   | 14161434 | T  | C   | 0.82 | 9054              | -3.38 | 7.35E-04        | 54.4           | 5371 | -5.54 | <b>2.96E-08</b> | 0              | 5261 | -3.77  | 1.62E-04        | 0              | 8009 | -3.55 | 3.93E-04 | 0              | 3562 | -2.79 | 5.25E-03 | 23.1           | 5323     | -0.03 | 0.98            | 0              |
| 1,2         | rs4410790   | 7   | 17284577 | T  | C   | 0.36 | 9054              | 7.36  | <b>1.81E-13</b> | 0              | 5371 | 1.90  | 0.06            | 0              | 5261 | 3.15   | 1.6E-03         | 18.2           | 8009 | 2.63  | 8.64E-03 | 63.1           | 3562 | 0.12  | 0.90     | 0              | 5323     | -8.07 | <b>7.20E-16</b> | 36.3           |
| 1,2         | rs6968554   | 7   | 17287106 | A  | G   | 0.37 | 9875              | 7.22  | <b>5.36E-13</b> | 0              | 6203 | 1.42  | 0.15            | 23.3           | 6089 | 2.78   | 5.4E-03         | 51.2           | 8835 | 2.73  | 6.32E-03 | 51.2           | 3562 | 0.08  | 0.93     | 0              | 6146     | -8.44 | <b>3.22E-17</b> | 0              |
| 1,2         | rs10275488  | 7   | 17303778 | T  | C   | 0.10 | 9054              | 5.85  | <b>4.81E-09</b> | 18.3           | 5371 | 1.83  | 0.07            | 20.1           | 5261 | 3.46   | 5.49E-04        | 0              | 8009 | 1.65  | 0.10     | 74.9           | 3562 | 0.11  | 0.91     | 0              | 5323     | -5.98 | <b>2.29E-09</b> | 37.1           |
| 1,2         | rs2892838   | 7   | 17324624 | A  | C   | 0.56 | 9054              | -4.55 | 5.39E-06        | 0              | 5371 | -0.44 | 0.66            | 0              | 5261 | -1.96  | 0.04984         | 0              | 8009 | -0.77 | 0.44     | 18.3           | 3562 | -0.17 | 0.86     | 0              | 5323     | 6.01  | <b>1.82E-09</b> | 28.5           |
| 1,2         | rs12909047  | 15  | 74782356 | A  | G   | 0.51 | 9054              | -6.77 | <b>1.28E-11</b> | 0              | 5371 | -3.62 | 2.97E-04        | 16.9           | 5261 | -5.70  | <b>1.20E-08</b> | 12             | 8009 | -2.59 | 9.60E-03 | 70.6           | 3562 | -0.03 | 0.97     | 49             | 5323     | 5.15  | 2.57E-07        | 0              |
| 1,2         | rs35107470  | 15  | 74817689 | A  | G   | 0.68 | 9054              | 8.20  | <b>2.41E-16</b> | 0              | 5371 | 3.25  | 1.16E-03        | 0              | 5261 | 5.18   | 2.24E-07        | 0              | 8009 | 2.56  | 0.01     | 57.9           | 3562 | -0.23 | 0.82     | 0              | 5323     | -7.58 | <b>3.45E-14</b> | 0              |
| 1,2         | rs62005807  | 15  | 74890981 | C  | G   | 0.11 | 9054              | -5.92 | <b>3.16E-09</b> | 0              | 5371 | -1.32 | 0.19            | 0              | 5261 | -2.98  | 2.92E-03        | 0              | 8009 | -0.18 | 0.86     | 0              | 3562 | -0.61 | 0.54     | 0              | 5323     | 6.65  | <b>2.90E-11</b> | 0              |
| 1,2         | rs2470893   | 15  | 75019449 | T  | C   | 0.33 | 9054              | -8.65 | <b>5.25E-18</b> | 48.5           | 5371 | -3.62 | 2.97E-04        | 71.8           | 5261 | -5.30  | 1.2E-07         | 59.1           | 8009 | -2.12 | 0.03     | 20.7           | 3562 | -0.38 | 0.70     | 0              | 5323     | 7.85  | <b>4.12E-15</b> | 0              |
| 1,2         | rs2472297   | 15  | 75027880 | T  | C   | 0.27 | 9876              | -9.34 | <b>1.00E-20</b> | 0              | 6204 | -3.07 | 2.15E-03        | 55.6           | 6090 | -5.27  | 1.4E-07         | 37.2           | 8836 | -1.82 | 0.07     | 32.4           | 3562 | -0.97 | 0.33     | 0              | 6147     | 9.58  | <b>9.45E-22</b> | 0              |
| 1,2         | rs66500423  | 19  | 41195170 | T  | C   | 0.67 | 9054              | -1.36 | 0.17            | 0              | 5371 | 3.34  | 8.47E-04        | 0              | 5261 | 1.10   | 0.27            | 65.3           | 8009 | 2.48  | 0.01     | 0              | 3562 | 0.64  | 0.52     | 12.7           | 5323     | 5.83  | <b>5.57E-09</b> | 0              |
| 1,2         | rs4803373   | 19  | 41326426 | C  | G   | 0.41 | 9054              | -1.25 | 0.21            | 0              | 5371 | 3.48  | 4.97E-04        | 0              | 5261 | 0.11   | 0.91            | 45.1           | 8009 | 2.93  | 3.43E-03 | 0              | 3562 | 0.14  | 0.89     | 0              | 5323     | 6.90  | <b>5.33E-12</b> | 0              |
| 1,2         | rs78011401  | 19  | 41332171 | T  | C   | 0.31 | 9054              | 1.60  | 0.11            | 0              | 5371 | -1.99 | 0.04712         | 0              | 5261 | 1.57   | 0.12            | 0              | 8009 | -2.11 | 0.03     | 0              | 3562 | 0.49  | 0.62     | 37.7           | 5323     | -5.78 | <b>7.60E-09</b> | 0              |
| 1,2         | rs11668399  | 19  | 41343871 | C  | G   | 0.29 | 9054              | -1.03 | 0.30            | 0              | 5371 | 2.98  | 2.85E-03        | 0              | 5261 | -0.28  | 0.78            | 9.8            | 8009 | 2.94  | 3.24E-03 | 0              | 3562 | 0.36  | 0.72     | 0              | 5323     | 6.37  | <b>1.91E-10</b> | 0              |
| 1,2         | rs56113850  | 19  | 41353107 | T  | C   | 0.43 | 9054              | -0.78 | 0.44            | 0              | 5371 | 5.43  | 5.69E-08        | 0              | 5261 | 0.11   | 0.91            | 68.8           | 8009 | 4.59  | 4.38E-06 | 52             | 3562 | 1.17  | 0.24     | 33             | 5323     | 9.59  | <b>9.28E-22</b> | 66             |
| 1,2         | rs56267346  | 19  | 41353338 | A  | G   | 0.82 | 9054              | -0.91 | 0.36            | 0              | 5371 | -3.93 | 8.53E-05        | 15.2           | 5261 | -0.51  | 0.61            | 0              | 8009 | -2.61 | 9.09E-03 | 26.9           | 3562 | 0.93  | 0.35     | 0              | 5323     | -6.13 | <b>8.87E-10</b> | 90.5           |
| 1,2         | rs28399442  | 19  | 41354458 | A  | C   | 0.02 | 9054              | 0.14  | 0.89            | 0              | 5371 | 2.52  | 0.01179         | 0              | 5261 | 0.26   | 0.79            | 0              | 8009 | 2.52  | 0.01     | 0              | 3562 | 0.47  | 0.64     | 0              | 5323     | 6.48  | <b>9.46E-11</b> | 92.5           |
| 1,2         | rs67210567  | 19  | 41357457 | T  | G   | 0.02 | 9054              | -1.38 | 0.17            | 24.2           | 5371 | 1.67  | 0.09            | 0              | 5261 | -0.89  | 0.37            | 0              | 8009 | 1.86  | 0.06     | 0              | 3562 | 0.18  | 0.86     | 0              | 5323     | 5.94  | <b>2.92E-09</b> | 57.8           |
| 1,2         | rs7260629   | 19  | 41357632 | T  | G   | 0.30 | 9054              | -1.12 | 0.26            | 0              | 5371 | 3.19  | 1.44E-03        | 0              | 5261 | -0.85  | 0.40            | 0              | 8009 | 3.77  | 1.66E-04 | 2.3            | 3562 | 1.62  | 0.11     | 0              | 5323     | 6.73  | <b>1.70E-11</b> | 0              |
| 1,2         | rs28602288  | 19  | 41388740 | T  | C   | 0.65 | 9054              | -0.68 | 0.50            | 26.5           | 5371 | -4.31 | 1.62E-05        | 0              | 5261 | -1.00  | 0.32            | 0              | 8009 | -2.16 | 0.03     | 0              | 3562 | -0.27 | 0.79     | 44.1           | 5323     | -5.72 | <b>1.05E-08</b> | 55.6           |
| 1,2         | rs79600176  | 19  | 41392490 | T  | C   | 0.98 | 9054              | -0.30 | 0.76            | 0              | 5371 | -2.96 | 3.10E-03        | 0              | 5261 | -0.50  | 0.61            | 0              | 8009 | -2.44 | 0.01     | 0              | 3562 | -0.02 | 0.99     | 0              | 5323     | -6.64 | <b>3.06E-11</b> | 92.3           |
| 1,2         | rs184589612 | 19  | 41412192 | T  | C   | 0.99 | 9054              | -0.76 | 0.45            | 32.7           | 5371 | -1.76 | 0.08            | 0              | 5261 | 0.05   | 0.96            | 0              | 8009 | -1.69 | 0.09     | 0              | 3562 | -1.35 | 0.18     | 16.4           | 5323     | -5.92 | <b>3.24E-09</b> | 80.2           |
| 1,2         | rs72480748  | 19  | 41414481 | A  | G   | 0.31 | 9054              | 1.19  | 0.24            | 33.2           | 5371 | -1.62 | 0.11            | 73.5           | 5261 | 0.12   | 0.91            | 70.7           | 8009 | -1.27 | 0.21     | 0              | 3562 | -1.85 | 0.06     | 0              | 5323     | -6.08 | <b>1.17E-09</b> | 0              |
| 1,2         | rs10425738  | 19  | 41417727 | A  | G   | 0.72 | 9054              | 0.97  | 0.33            | 0              | 5371 | -2.24 | 0.02515         | 0              | 5261 | 0.13   | 0.89            | 0              | 8009 | -2.02 | 0.04     | 9.6            | 3562 | -0.49 | 0.62     | 0              | 5323     | -5.65 | <b>1.60E-08</b> | 0              |
| 1,2         | rs56881024  | 19  | 41485380 | A  | T   | 0.65 | 9054              | 0.73  | 0.46            | 0              | 5371 | -3.09 | 2.01E-03        | 0              | 5261 | -0.09  | 0.93            | 0              | 8009 | -2.28 | 0.02     | 0              | 3562 | -0.63 | 0.53     | 24.8           | 5323     | -5.57 | <b>2.50E-08</b> | 0              |

Chr: chromosome; EA: effect allele; EAF: effect allele frequency; NEA: non-effect allele;

<sup>a</sup> See Table S1 for metabolite names

Table S5. Genome-wide significant indel-metabolite associations

| Chr | Position | rsID        | Notes                                                     | EA       | NEA                | EAF  | 137X <sup>a</sup> |       |         |                | 17X  |       |         |                | 13X  |        |       |                | 37X  |       |         |                | 137U |       |       |                | 17X/137X |       |         |                |      |
|-----|----------|-------------|-----------------------------------------------------------|----------|--------------------|------|-------------------|-------|---------|----------------|------|-------|---------|----------------|------|--------|-------|----------------|------|-------|---------|----------------|------|-------|-------|----------------|----------|-------|---------|----------------|------|
|     |          |             |                                                           |          |                    |      | N                 | Z     | P       | I <sup>2</sup> | N    | Z     | P       | I <sup>2</sup> | N    | Z      | P     | I <sup>2</sup> | N    | Z     | P       | I <sup>2</sup> | N    | Z     | P     | I <sup>2</sup> | N        | Z     | P       | I <sup>2</sup> |      |
| 7   | 17385506 | rs11400459  | reported in Table 1                                       | A        | AT                 | 0.64 | 9054              | -4.52 | 6.3E-06 | 0              | 5371 | -0.82 | 0.41    | 0              | 5261 | -1.81  | 0.07  | 0              | 8009 | -1.07 | 0.28    | 23.2           | 3562 | 0.19  | 0.85  | 0              | 5323     | 6.23  | 4.6E-10 | 67.7           |      |
| 7   | 17396746 | rs10683220  | reported in Table 1                                       | G        | GTTAACA            | 0.63 | 9054              | -4.70 | 2.6E-06 | 0              | 5371 | -0.74 | 0.46    | 0              | 5261 | -1.63  | 0.10  | 0              | 8009 | -1.06 | 0.29    | 23.5           | 3562 | -0.07 | 0.94  | 0              | 5323     | 6.11  | 1.0E-09 | 71.7           |      |
| 19  | 41361572 | rs5828081   | reported in Table 1                                       | AT       | A                  | 0.66 | 9054              | 0.75  | 0.45    | 0              | 5371 | -3.80 | 1.4E-04 | 0              | 5261 | -0.004 | 1.00  | 53.2           | 8009 | -2.85 | 4.3E-03 | 44.7           | 3562 | -1.31 | 0.19  | 58             | 5323     | -6.92 | 4.7E-12 | 0              |      |
| 19  | 41363094 | rs200292835 | reported in Table 1                                       | T        | TTTGT              | 0.68 | 9054              | 1.22  | 0.22    | 0              | 5371 | -3.04 | 2.4E-03 | 0              | 5261 | 0.49   | 0.63  | 36.1           | 8009 | -3.44 | 5.9E-04 | 0              | 3562 | -2.36 | 0.02  | 0              | 5323     | -5.71 | 1.1E-08 | 0              |      |
| 19  | 41197268 | rs35255138  | r <sup>2</sup> =0.98 with rs66500423                      | G        | GC                 | 0.67 | 9054              | -1.51 | 0.13    | 0              | 5371 | 3.20  | 1.4E-03 | 0              | 5261 | 1.03   | 0.30  | 58.4           | 8009 | 2.57  | 0.01    | 0              | 3562 | 0.42  | 0.67  | 0              | 5323     | 5.66  | 1.6E-08 | 0              |      |
| 19  | 41329838 | rs68060906  | r <sup>2</sup> =0.42 with rs4803373                       | C        | CAGGG              | 0.55 | 9054              | 0.01  | 0.99    | 25.7           | 5371 | -3.42 | 6.2E-04 | 0              | 5261 | 0.55   | 0.58  | 28.9           | 8009 | -1.30 | 0.19    | 62.5           | 3562 | -0.25 | 0.80  | 0              | 5323     | -6.37 | 1.9E-10 | 0              |      |
| 19  | 41344569 | rs11271389  | r <sup>2</sup> =0.56 with rs11668399                      | CTTTC    | CTTTCCTTCTTCTCTTCT | C    | 0.73              | 9054  | 0.86    | 0.39           | 0    | 5371  | -2.84   | 4.5E-03        | 0    | 5261   | 0.04  | 0.97           | 69   | 8009  | -2.97   | 3.0E-03        | 0    | 3562  | -1.10 | 0.27           | 0        | 5323  | -5.81   | 6.2E-09        | 0    |
| 19  | 41363091 | rs200258898 | r <sup>2</sup> =0.52 with rs56113850                      | C        | CTG                | 0.66 | 9054              | 0.59  | 0.56    | 0              | 5371 | -3.77 | 1.6E-04 | 0              | 5261 | 0.16   | 0.87  | 74.3           | 8009 | -3.38 | 7.2E-04 | 55             | 3562 | -1.07 | 0.28  | 45.4           | 5323     | -6.67 | 2.6E-11 | 0              |      |
| 19  | 41363095 | rs201662855 | r <sup>2</sup> =0.62 with rs200292835 (indel)             | T        | TTTG               | 0.71 | 9054              | 1.40  | 0.16    | 5.5            | 5371 | -3.16 | 1.6E-03 | 0              | 5261 | 0.14   | 0.89  | 75.9           | 8009 | -3.86 | 1.1E-04 | 0              | 3562 | -2.20 | 0.03  | 26.3           | 5323     | -5.69 | 1.2E-08 | 0              |      |
| 19  | 41399598 | rs201285225 | r <sup>2</sup> =1 with rs79600176                         | CTTACTCT | CTTGA              | C    | 0.98              | 9054  | -0.22   | 0.83           | 0    | 5371  | -2.80   | 5.1E-03        | 0    | 5261   | -0.38 | 0.71           | 0    | 8009  | -2.57   | 0.01           | 0    | 3562  | 0.01  | 0.99           | 0        | 5323  | -6.67   | 2.6E-11        | 92.2 |
| 19  | 41403872 | rs202174841 | r <sup>2</sup> =0.84 with rs79600176, rs201285225 (indel) | A        | AG                 | 0.98 | 9054              | -1.10 | 0.27    | 0              | 5371 | -2.88 | 3.9E-03 | 0              | 5261 | -0.75  | 0.45  | 0              | 8009 | -2.42 | 0.02    | 0              | 3562 | 0.08  | 0.93  | 30.1           | 5323     | -5.70 | 1.2E-08 | 68.5           |      |

Chr: chromosome; EA: effect allele; EAF: effect allele frequency; NEA: non-effect allele;

<sup>a</sup> See Table S1 for metabolites names

Table S6. Study-level SNP-Metabolite Associations

| Study    | Trait <sup>a</sup> | Chr | Position | rsID        | EA | NEA     | Beta  | SE   | P        | N        | Imputed | Info |
|----------|--------------------|-----|----------|-------------|----|---------|-------|------|----------|----------|---------|------|
| SHIP     | 137X               | 7   | 17284577 | rs4410790   | T  | C       | 0.11  | 0.04 | 0.02     | 951      | yes     | 0.99 |
| PIVUS    | 137X               | 7   | 17284577 | rs4410790   | T  | C       | 0.15  | 0.05 | 1.71E-03 | 910      | yes     | 0.99 |
| TwinGene | 137X               | 7   | 17284577 | rs4410790   | T  | C       | 0.09  | 0.04 | 0.01     | 1600     | yes     | 0.99 |
| TwinsUK  | 137X               | 7   | 17284577 | rs4410790   | T  | C       | 0.13  | 0.02 | 1.49E-08 | 4555     | no      | 1.00 |
| ULSAM    | 137X               | 7   | 17284577 | rs4410790   | T  | C       | 0.08  | 0.05 | 0.10     | 1038     | yes     | 0.99 |
| PIVUS    | 137X               | 7   | 17287106 | rs6968554   | A  | G       | 0.14  | 0.05 | 2.22E-03 | 910      | no      | 1.00 |
| SHIP     | 137X               | 7   | 17287106 | rs6968554   | A  | G       | 0.11  | 0.04 | 0.01     | 951      | yes     | 1.00 |
| SKIPOGH  | 137X               | 7   | 17287106 | rs6968554   | A  | G       | 0.03  | 0.05 | 0.54     | 821      | no      | NA   |
| TwinGene | 137X               | 7   | 17287106 | rs6968554   | A  | G       | 0.09  | 0.04 | 0.01     | 1600     | no      | 1.00 |
| TwinsUK  | 137X               | 7   | 17287106 | rs6968554   | A  | G       | 0.13  | 0.02 | 1.65E-08 | 4555     | yes     | 1.00 |
| ULSAM    | 137X               | 7   | 17287106 | rs6968554   | A  | G       | 0.07  | 0.04 | 0.11     | 1038     | no      | 1.00 |
| PIVUS    | 137X               | 7   | 17303778 | rs10275488  | T  | C       | 0.22  | 0.08 | 4.29E-03 | 910      | no      | 1.00 |
| SHIP     | 137X               | 7   | 17303778 | rs10275488  | T  | C       | 0.15  | 0.07 | 0.03     | 951      | yes     | 1.00 |
| TwinGene | 137X               | 7   | 17303778 | rs10275488  | T  | C       | 0.05  | 0.06 | 0.44     | 1600.004 | no      | 1.00 |
| TwinsUK  | 137X               | 7   | 17303778 | rs10275488  | T  | C       | 0.17  | 0.03 | 9.75E-07 | 4555     | no      | 1.00 |
| ULSAM    | 137X               | 7   | 17303778 | rs10275488  | T  | C       | 0.10  | 0.07 | 0.19     | 1038     | no      | 1.00 |
| PIVUS    | 137X               | 7   | 17324624 | rs2892838   | A  | C       | -0.10 | 0.05 | 0.03     | 910      | yes     | 1.00 |
| SHIP     | 137X               | 7   | 17324624 | rs2892838   | A  | C       | -0.06 | 0.04 | 0.15     | 951      | yes     | 1.00 |
| TwinGene | 137X               | 7   | 17324624 | rs2892838   | A  | C       | -0.06 | 0.04 | 0.08     | 1600     | yes     | 0.99 |
| TwinsUK  | 137X               | 7   | 17324624 | rs2892838   | A  | C       | -0.08 | 0.02 | 5.05E-04 | 4555     | yes     | 0.99 |
| ULSAM    | 137X               | 7   | 17324624 | rs2892838   | A  | C       | -0.03 | 0.04 | 0.51     | 1038.001 | yes     | 1.00 |
| TwinGene | 137X               | 15  | 74782356 | rs12909047  | A  | G       | -0.10 | 0.04 | 0.01     | 1600     | yes     | 0.90 |
| PIVUS    | 137X               | 15  | 74782356 | rs12909047  | A  | G       | -0.07 | 0.05 | 0.13     | 910.001  | yes     | 0.95 |
| SHIP     | 137X               | 15  | 74782356 | rs12909047  | A  | G       | -0.14 | 0.04 | 1.62E-03 | 951      | yes     | 0.96 |
| TwinsUK  | 137X               | 15  | 74782356 | rs12909047  | A  | G       | -0.11 | 0.02 | 7.46E-07 | 4555     | yes     | 0.98 |
| ULSAM    | 137X               | 15  | 74782356 | rs12909047  | A  | G       | -0.09 | 0.04 | 0.04     | 1038     | yes     | 0.96 |
| TwinGene | 137X               | 15  | 74817689 | rs35107470  | A  | G       | 0.10  | 0.04 | 0.02     | 1600     | yes     | 0.67 |
| PIVUS    | 137X               | 15  | 74817689 | rs35107470  | A  | G       | 0.21  | 0.05 | 7.23E-05 | 910      | yes     | 0.82 |
| SHIP     | 137X               | 15  | 74817689 | rs35107470  | A  | G       | 0.17  | 0.05 | 9.03E-04 | 951      | yes     | 0.85 |
| TwinsUK  | 137X               | 15  | 74817689 | rs35107470  | A  | G       | 0.15  | 0.02 | 3.87E-09 | 4555     | yes     | 0.95 |
| ULSAM    | 137X               | 15  | 74817689 | rs35107470  | A  | G       | 0.11  | 0.05 | 0.04     | 1038.001 | yes     | 0.84 |
| TwinGene | 137X               | 15  | 74890981 | rs62005807  | C  | G       | -0.16 | 0.08 | 0.04     | 1600     | yes     | 0.45 |
| PIVUS    | 137X               | 15  | 74890981 | rs62005807  | C  | G       | -0.24 | 0.08 | 1.70E-03 | 909.9995 | yes     | 0.83 |
| SHIP     | 137X               | 15  | 74890981 | rs62005807  | C  | G       | -0.07 | 0.08 | 0.37     | 951      | yes     | 1.00 |
| TwinsUK  | 137X               | 15  | 74890981 | rs62005807  | C  | G       | -0.17 | 0.04 | 5.97E-05 | 4555     | yes     | 0.90 |
| ULSAM    | 137X               | 15  | 74890981 | rs62005807  | C  | G       | -0.18 | 0.07 | 6.45E-03 | 1038     | no      | 1.00 |
| PIVUS    | 137X               | 15  | 75019449 | rs2470893   | T  | C       | -0.22 | 0.05 | 5.29E-06 | 910      | no      | 1.00 |
| SHIP     | 137X               | 15  | 75019449 | rs2470893   | T  | C       | -0.20 | 0.05 | 2.20E-05 | 951      | yes     | 1.00 |
| TwinGene | 137X               | 15  | 75019449 | rs2470893   | T  | C       | -0.08 | 0.04 | 0.03     | 1600     | no      | 1.00 |
| TwinsUK  | 137X               | 15  | 75019449 | rs2470893   | T  | C       | -0.13 | 0.02 | 1.29E-08 | 4555     | no      | 1.00 |
| ULSAM    | 137X               | 15  | 75019449 | rs2470893   | T  | C       | -0.12 | 0.05 | 8.67E-03 | 1038     | no      | 1.00 |
| PIVUS    | 137X               | 15  | 75027880 | rs2472297   | T  | C       | -0.20 | 0.05 | 9.80E-05 | 910      | no      | 1.00 |
| SHIP     | 137X               | 15  | 75027880 | rs2472297   | T  | C       | -0.20 | 0.05 | 5.55E-05 | 951      | yes     | 1.00 |
| SKIPOGH  | 137X               | 15  | 75027880 | rs2472297   | T  | C       | -0.11 | 0.06 | 0.07     | 822      | no      | NA   |
| TwinGene | 137X               | 15  | 75027880 | rs2472297   | T  | C       | -0.12 | 0.04 | 1.42E-03 | 1600     | no      | 0.99 |
| TwinsUK  | 137X               | 15  | 75027880 | rs2472297   | T  | C       | -0.15 | 0.02 | 1.65E-09 | 4555     | no      | 1.00 |
| ULSAM    | 137X               | 15  | 75027880 | rs2472297   | T  | C       | -0.16 | 0.05 | 1.30E-03 | 1038     | no      | 1.00 |
| SHIP     | 13X                | 15  | 74782356 | rs12909047  | A  | G       | -0.15 | 0.05 | 1.04E-03 | 860      | yes     | 0.96 |
| TwinsUK  | 13X                | 15  | 74782356 | rs12909047  | A  | G       | -0.11 | 0.02 | 1.71E-06 | 4401     | yes     | 0.98 |
| TwinsUK  | 17X                | 6   | 14161434 | rs62391270  | T  | C       | -0.14 | 0.03 | 1.86E-06 | 4419     | yes     | 0.97 |
| SHIP     | 17X                | 6   | 14161434 | rs62391270  | T  | C       | -0.16 | 0.06 | 3.60E-03 | 952      | yes     | 1.00 |
| SHIP     | 17X/137X           | 7   | 17284577 | rs4410790   | T  | C       | -0.10 | 0.05 | 0.02     | 943      | yes     | 0.99 |
| TwinsUK  | 17X/137X           | 7   | 17284577 | rs4410790   | T  | C       | -0.18 | 0.02 | 4.33E-15 | 4380     | no      | 1.00 |
| SHIP     | 17X/137X           | 7   | 17287106 | rs6968554   | A  | G       | -0.11 | 0.05 | 0.02     | 943      | yes     | 1.00 |
| SKIPOGH  | 17X/137X           | 7   | 17287106 | rs6968554   | A  | G       | -0.14 | 0.05 | 3.14E-03 | 823      | no      | NA   |
| TwinsUK  | 17X/137X           | 7   | 17287106 | rs6968554   | A  | G       | -0.18 | 0.02 | 9.14E-15 | 4380     | yes     | 1.00 |
| SHIP     | 17X/137X           | 7   | 17303778 | rs10275488  | T  | C       | -0.10 | 0.07 | 0.17     | 943      | yes     | 1.00 |
| TwinsUK  | 17X/137X           | 7   | 17303778 | rs10275488  | T  | C       | -0.21 | 0.04 | 2.65E-09 | 4380     | no      | 1.00 |
| SHIP     | 17X/137X           | 7   | 17324624 | rs2892838   | A  | C       | 0.07  | 0.05 | 0.14     | 943      | yes     | 1.00 |
| TwinsUK  | 17X/137X           | 7   | 17324624 | rs2892838   | A  | C       | 0.14  | 0.02 | 2.65E-09 | 4380     | yes     | 0.99 |
| SHIP     | 17X/137X           | 7   | 17385506 | rs11400459  | A  | AT      | 0.05  | 0.05 | 0.30     | 943      | yes     | 0.98 |
| TwinsUK  | 17X/137X           | 7   | 17385506 | rs11400459  | A  | AT      | 0.15  | 0.02 | 1.54E-10 | 4380     | yes     | 1.00 |
| SHIP     | 17X/137X           | 7   | 17396746 | rs10683220  | G  | GTTAACA | 0.04  | 0.05 | 0.38     | 943      | yes     | 0.99 |
| TwinsUK  | 17X/137X           | 7   | 17396746 | rs10683220  | G  | GTTAACA | 0.15  | 0.02 | 2.31E-10 | 4380     | yes     | 0.99 |
| SHIP     | 17X/137X           | 15  | 74782356 | rs12909047  | A  | G       | 0.08  | 0.05 | 0.08     | 943      | yes     | 0.96 |
| TwinsUK  | 17X/137X           | 15  | 74782356 | rs12909047  | A  | G       | 0.11  | 0.02 | 1.05E-06 | 4380     | yes     | 0.98 |
| SHIP     | 17X/137X           | 15  | 74817689 | rs35107470  | A  | G       | -0.16 | 0.05 | 1.85E-03 | 943      | yes     | 0.85 |
| TwinsUK  | 17X/137X           | 15  | 74817689 | rs35107470  | A  | G       | -0.18 | 0.03 | 4.61E-12 | 4380     | yes     | 0.95 |
| SHIP     | 17X/137X           | 15  | 74890981 | rs62005807  | C  | G       | 0.16  | 0.08 | 0.04     | 943      | yes     | 1.00 |
| TwinsUK  | 17X/137X           | 15  | 74890981 | rs62005807  | C  | G       | 0.27  | 0.04 | 1.90E-10 | 4380     | yes     | 0.90 |
| SHIP     | 17X/137X           | 15  | 75019449 | rs2470893   | T  | C       | 0.16  | 0.05 | 1.08E-03 | 943      | yes     | 1.00 |
| TwinsUK  | 17X/137X           | 15  | 75019449 | rs2470893   | T  | C       | 0.18  | 0.02 | 9.10E-13 | 4380     | no      | 1.00 |
| SHIP     | 17X/137X           | 15  | 75027880 | rs2472297   | T  | C       | 0.17  | 0.05 | 8.02E-04 | 943      | yes     | 1.00 |
| SKIPOGH  | 17X/137X           | 15  | 75027880 | rs2472297   | T  | C       | 0.29  | 0.06 | 5.77E-07 | 824      | no      | NA   |
| TwinsUK  | 17X/137X           | 15  | 75027880 | rs2472297   | T  | C       | 0.20  | 0.02 | 5.85E-15 | 4380     | no      | 1.00 |
| SHIP     | 17X/137X           | 19  | 41195170 | rs66500423  | T  | C       | 0.14  | 0.05 | 2.37E-03 | 943      | yes     | 1.00 |
| TwinsUK  | 17X/137X           | 19  | 41195170 | rs66500423  | T  | C       | 0.12  | 0.02 | 5.14E-07 | 4380     | yes     | 0.99 |
| SHIP     | 17X/137X           | 19  | 41326426 | rs4803373   | C  | G       | 0.16  | 0.05 | 5.27E-04 | 943      | yes     | 0.92 |
| TwinsUK  | 17X/137X           | 19  | 41326426 | rs4803373   | C  | G       | 0.14  | 0.02 | 1.97E-09 | 4380     | yes     | 0.90 |
| SHIP     | 17X/137X           | 19  | 41332171 | rs78011401  | T  | C       | -0.16 | 0.05 | 1.35E-03 | 943      | yes     | 0.90 |
| TwinsUK  | 17X/137X           | 19  | 41332171 | rs78011401  | T  | C       | -0.11 | 0.02 | 1.03E-06 | 4380     | yes     | 0.98 |
| SHIP     | 17X/137X           | 19  | 41343871 | rs11668399  | C  | G       | 0.10  | 0.05 | 0.05     | 943      | yes     | 0.88 |
| TwinsUK  | 17X/137X           | 19  | 41343871 | rs11668399  | C  | G       | 0.14  | 0.02 | 9.03E-10 | 4380     | yes     | 0.99 |
| SHIP     | 17X/137X           | 19  | 41353107 | rs56113850  | T  | C       | 0.25  | 0.04 | 2.01E-08 | 943      | yes     | 0.94 |
| TwinsUK  | 17X/137X           | 19  | 41353107 | rs56113850  | T  | C       | 0.17  | 0.02 | 1.56E-15 | 4380     | yes     | 0.94 |
| SHIP     | 17X/137X           | 19  | 41353338 | rs56267346  | A  | G       | -0.31 | 0.06 | 3.10E-08 | 943      | yes     | 0.91 |
| TwinsUK  | 17X/137X           | 19  | 41353338 | rs56267346  | A  | G       | -0.13 | 0.03 | 2.71E-05 | 4380     | yes     | 0.95 |
| SHIP     | 17X/137X           | 19  | 41354458 | rs28399442  | A  | C       | 0.86  | 0.14 | 1.28E-09 | 943      | yes     | 0.99 |
| TwinsUK  | 17X/137X           | 19  | 41354458 | rs28399442  | A  | C       | 0.41  | 0.09 | 1.47E-05 | 4380     | yes     | 0.99 |
| SHIP     | 17X/137X           | 19  | 41357457 | rs67210567  | T  | G       | 0.22  | 0.20 | 0.27     | 943      | yes     | 0.66 |
| TwinsUK  | 17X/137X           | 19  | 41357457 | rs67210567  | T  | G       | 0.50  | 0.08 | 1.61E-09 | 4380     | yes     | 0.99 |
| SHIP     | 17X/137X           | 19  | 41357632 | rs7260629   | T  | G       | 0.14  | 0.05 | 5.05E-03 | 943      | yes     | 0.88 |
| TwinsUK  | 17X/137X           | 19  | 41357632 | rs7260629   | T  | G       | 0.14  | 0.02 | 9.21E-10 | 4380     | yes     | 0.94 |
| SHIP     | 17X/137X           | 19  | 41361572 | rs5828081   | AT | A       | -0.16 | 0.05 | 5.92E-04 | 943      | yes     | 0.98 |
| TwinsUK  | 17X/137X           | 19  | 41361572 | rs5828081   | AT | A       | -0.13 | 0.02 | 1.48E-09 | 4380     | yes     | 0.98 |
| SHIP     | 17X/137X           | 19  | 41363094 | rs200292835 | T  | TTTTG   | -0.09 | 0.05 | 0.09     | 943      | yes     | 0.80 |
| TwinsUK  | 17X/137X           | 19  | 41363094 | rs200292835 | T  | TTTTG   | -0.13 | 0.02 | 3.49E-08 | 4380     | yes     | 0.97 |
| SHIP     | 17X/137X           | 19  | 41388740 | rs28602288  | T  | C       | -0.18 | 0.05 | 1.54E-04 | 943      | yes     | 0.98 |
| TwinsUK  | 17X/137X           | 19  | 41388740 | rs28602288  | T  | C       | -0.11 | 0.02 | 5.12E-06 | 4380     | yes     | 0.96 |
| SHIP     | 17X/137X           | 19  | 41392490 | rs79600176  | T  | C       | -0.85 | 0.14 | 1.12E-09 | 943      | yes     | 1.00 |
| TwinsUK  | 17X/137X           | 19  | 41392490 | rs79600176  | T  | C       | -0.41 | 0.09 | 6.55E-06 | 4380     | yes     | 0.99 |
| SHIP     | 17X/137X           | 19  | 41412192 | rs184589612 | T  | C       | -0.84 | 0.18 | 5.45E-06 | 943      | yes     | 0.89 |
| TwinsUK  | 17X/137X           | 19  | 41412192 | rs184589612 | T  | C       | -0.50 | 0.11 | 9.73E-06 | 4380     | yes     | 1.   |

**Table S7. Follow-up Candidate SNP-Metabolite Associations**

[illegible]

Chr: chromosome; E: effect; EA: effect allele; EAF: effect allele frequency; NEA: non-effect allele;

<sup>a</sup> See Table S1 for metabolite names

Table S8. Top Pathways

| Database                     | Gene Set (short name)                                | Original Gene Set Size | 137X <sup>a</sup>       |                |             | 17X                     |                |             | 13X                     |                |             | 17X/137X                |                |                 |
|------------------------------|------------------------------------------------------|------------------------|-------------------------|----------------|-------------|-------------------------|----------------|-------------|-------------------------|----------------|-------------|-------------------------|----------------|-----------------|
|                              |                                                      |                        | Effective Gene Set Size | Nominal GSEA P | FDR         | Effective Gene Set Size | Nominal GSEA P | FDR         | Effective Gene Set Size | Nominal GSEA P | FDR         | Effective Gene Set Size | Nominal GSEA P | FDR             |
| REACTOME                     | Xenobiotics (xeno)                                   | 15                     | 10                      | 0.40           | 0.96        | 12.00                   | 4.00E-04       | <b>0.02</b> | 12                      | 0.46           | 0.85        | 13                      | 1.40E-05       | <b>1.90E-03</b> |
| GOTERM                       | drug metabolic process (drug)                        | 15                     | 13                      | 0.49           | 1.00        | 13                      | 2.10E-05       | <b>0.01</b> | 13                      | 0.14           | 1.00        | 13                      | 4.00E-04       | 1.40E-01        |
| Panther                      | Nicotine degradation (nicotine)                      | 10                     | 9                       | 1.00           | 0.96        | 8.00                    | 4.00E-04       | <b>0.02</b> | 8                       | 0.34           | 0.97        | 8                       | 1.00E-04       | <b>0.01</b>     |
| Panther (biological process) | NF-kappaB cascade (NFkB)                             | 71                     | 58                      | 0.57           | 1.00        | 61.00                   | 4.00E-04       | <b>0.02</b> | 60                      | 0.35           | 0.95        | 59                      | 1.00E-04       | <b>0.03</b>     |
| Panther                      | 5HT3-type receptor mediated signaling pathway (5HT3) | 7                      | 7                       | 1.00           | 0.96        | 7.00                    | 3.10E-03       | <b>0.05</b> | 6                       | 2.20E-03       | <b>0.03</b> | 4                       | 1.00           | 0.97            |
| KEGG                         | N glycan biosynthesis (N-glycan)                     | 46                     | 45                      | 3.00E-04       | <b>0.03</b> | 44.00                   | 0.178          | 0.61        | 44                      | 0.38           | 0.93        | 44                      | 0.65           | 1.00            |
| Panther (biological process) | Other polysaccharide metabolism (other poly)         | 142                    | 110                     | 8.40E-05       | <b>0.04</b> | 112.00                  | 0.488          | 0.97        | 109                     | 0.98           | 1.00        | 109                     | 0.92           | 1.00            |

<sup>a</sup> See Table S1 for metabolite names



Table S9 Top Gene-based Tests (P<0.05)

| Gene.ID | Gene     | Chr | Gene start (kb) | Gene end (kb) | Locus         | Pathway <sup>a</sup> | 137X <sup>b</sup> |             |           | 17X             |             |           | 13X             |             |           | 17X/137X        |             |           |
|---------|----------|-----|-----------------|---------------|---------------|----------------------|-------------------|-------------|-----------|-----------------|-------------|-----------|-----------------|-------------|-----------|-----------------|-------------|-----------|
|         |          |     |                 |               |               |                      | Gene-based P      | Top SNP     | Top SNP P | Gene-based P    | Top SNP     | Top SNP P | Gene-based P    | Top SNP     | Top SNP P | Gene-based P    | Top SNP     | Top SNP P |
| 1543    | CYP1A1   | 15  | 74991882        | 75037877      | 15q24.1       | nicotine,drug,CYP1A2 | <b>1.00E-06</b>   | rs2472297   | 1.00E-20  | <b>1.69E-02</b> | rs2470893   | 0.0002969 | <b>1.44E-04</b> | rs2470893   | 1.16E-07  | <b>2.00E-06</b> | rs2472297   | 9.45E-22  |
| 1544    | CYP1A2   | 15  | 75021183        | 75068941      | 15q24.1       | nicotine,drug,CYP1A2 | <b>1.00E-06</b>   | rs2472297   | 1.00E-20  | <b>2.63E-02</b> | rs2470893   | 0.0002969 | <b>4.62E-04</b> | rs2470893   | 1.16E-07  | <b>3.00E-06</b> | rs2472297   | 9.45E-22  |
| 196     | AHR      | 7   | 17318275        | 17405775      | 7p15          | CYP1A2               | <b>3.00E-06</b>   | rs2389763   | 7.17E-10  | 2.34E-01        | rs73079637  | 0.01156   | <b>6.74E-03</b> | rs10275488  | 0.0005489 | <b>1.00E-06</b> | rs2389763   | 1.36E-13  |
| 5530    | PPP3CA   | 4   | 101924586       | 102288628     | 4q24          | other poly           | <b>7.59E-04</b>   | rs10516471  | 7.09E-06  | 1.91E-01        | rs13121347  | 0.0113    | 9.09E-02        | rs10516471  | 0.00612   | 2.14E-01        | rs74351276  | 0.0137    |
| 10195   | ALG3     | 3   | 183940116       | 183987313     | 3q27.1        | N-glycan,other poly  | <b>1.10E-03</b>   | rs112813049 | 0.0002055 | <b>5.22E-04</b> | rs6806162   | 4.25E-05  | <b>1.31E-03</b> | rs71318361  | 0.0002677 | 3.48E-01        | rs3892286   | 0.008539  |
| 11253   | MAN1B1   | 9   | 139961378       | 140023639     | 9q34          | N-glycan,other poly  | <b>3.73E-03</b>   | rs10870198  | 5.33E-05  | 1.24E-01        | rs11146019  | 0.007926  | 2.85E-01        | rs11146019  | 0.01016   | 4.32E-01        | rs185925877 | 0.03007   |
| 2131    | EXT1     | 8   | 118791601       | 119144058     | 8q24.11       | other poly           | <b>3.99E-03</b>   | rs1824175   | 0.0001558 | 9.59E-02        | rs17431672  | 0.000396  | <b>4.90E-02</b> | rs17431672  | 0.004843  | 2.88E-01        | rs148506839 | 0.008394  |
| 4122    | MAN2A2   | 15  | 91427419        | 91485815      | 15q26.1       | N-glycan             | <b>4.09E-03</b>   | rs11073963  | 0.0002156 | 7.19E-02        | rs79742014  | 0.000467  | 5.79E-02        | rs78164913  | 0.0002781 | 1.70E-01        | rs79742014  | 0.01599   |
| 6489    | ST8SIA1  | 12  | 22326324        | 22507648      | 12p12.1-p11.2 | other poly           | <b>6.94E-03</b>   | rs2072542   | 0.0009769 | 8.89E-02        | rs976711    | 0.002266  | 5.08E-01        | rs75130288  | 0.02272   | 2.22E-01        | rs75130288  | 0.008085  |
| 9956    | HS3ST2   | 16  | 22805859        | 22947659      | 16p12         | other poly           | <b>7.12E-03</b>   | rs9302402   | 0.0005735 | <b>3.94E-03</b> | rs756800    | 0.0007964 | <b>4.42E-02</b> | rs73543184  | 0.0004082 | 1.98E-01        | rs71378487  | 0.009431  |
| 2590    | GALNT2   | 1   | 230173535       | 230437876     | 1q41-q42      | other poly           | <b>7.89E-03</b>   | rs10864696  | 5.67E-05  | <b>4.23E-02</b> | rs6659554   | 0.0006264 | <b>9.30E-03</b> | rs12733702  | 0.0002905 | 1.25E-01        | rs74145438  | 0.001859  |
| 57452   | GALNT16  | 14  | 69706680        | 69841190      | 14q24.1       | other poly           | <b>8.90E-03</b>   | rs140734049 | 0.0006341 | <b>4.36E-03</b> | rs76314768  | 0.0004334 | 5.73E-02        | rs116398598 | 0.003224  | 2.63E-01        | rs4271533   | 0.005408  |
| 8509    | NDST2    | 10  | 75541668        | 75591589      | 10q22         | other poly           | <b>1.03E-02</b>   | rs2675662   | 0.0013    | 1.69E-01        | rs35972789  | 0.02259   | 2.04E-01        | rs35972789  | 0.0292    | 2.34E-01        | rs35207902  | 0.007145  |
| 55907   | CMAS     | 12  | 22179109        | 22238606      | 12p12.1       | other poly           | <b>1.09E-02</b>   | rs3809205   | 0.0001651 | <b>2.41E-02</b> | rs7047340   | 0.003115  | <b>2.26E-02</b> | rs10770876  | 0.00282   | 4.12E-01        | rs3809204   | 0.025     |
| 6927    | HNFI A   | 12  | 121396548       | 121460314     | 12q24.2       | CYP1A2               | <b>1.47E-02</b>   | rs11065381  | 0.0006045 | 1.60E-01        | rs78197988  | 0.008192  | 2.19E-01        | rs78671297  | 0.00549   | 3.92E-01        | rs7969196   | 0.01252   |
| 3036    | HAS1     | 19  | 52196364        | 52247221      | 19q13.4       | other poly           | <b>1.77E-02</b>   | rs75310023  | 4.40E-05  | 3.98E-01        | rs10408866  | 0.0293    | 1.13E-01        | rs3829652   | 0.00439   | 5.37E-02        | rs4802856   | 0.001241  |
| 50614   | GALNT9   | 12  | 132660916       | 132925905     | 12q24.33      | other poly           | <b>2.19E-02</b>   | rs28437244  | 0.0006187 | <b>2.05E-02</b> | rs28412188  | 9.63E-05  | 8.79E-02        | rs28735021  | 0.006779  | 1.60E-01        | rs61945704  | 0.005272  |
| 440138  | ALG11    | 13  | 52566522        | 52623780      | 13q14.2       | N-glycan,other poly  | <b>2.21E-02</b>   | rs61958804  | 0.004195  | 8.87E-01        | rs73184327  | 0.1454    | 1.46E-01        | rs56219214  | 0.009037  | 6.82E-01        | rs117014324 | 0.0969    |
| 2683    | B4GALT1  | 9   | 33090638        | 33187356      | 9p13          | N-glycan,other poly  | <b>2.27E-02</b>   | rs146570729 | 0.0001358 | <b>2.42E-03</b> | rs62544388  | 5.64E-05  | <b>3.46E-02</b> | rs874202    | 0.0004913 | 8.09E-02        | rs7380500   | 0.007483  |
| 8813    | DPM1     | 20  | 49531404        | 49595060      | 20q13.13      | N-glycan             | <b>2.31E-02</b>   | rs142825371 | 0.0006431 | 1.75E-01        | rs4809815   | 0.0178    | 1.01E-01        | rs6096207   | 0.02281   | 1.52E-01        | rs910074    | 0.02171   |
| 8702    | B4GALT4  | 3   | 118910588       | 118979752     | 3q13.3        | other poly           | <b>2.36E-02</b>   | rs58488777  | 0.002003  | 1.07E-01        | rs149996849 | 0.008004  | 1.14E-01        | rs58488777  | 0.003747  | 3.64E-01        | rs75951664  | 0.007496  |
| 3551    | IKKBK    | 8   | 42108819        | 42210171      | 8p11.2        | NFKB                 | <b>2.09E-02</b>   | rs13270748  | 0.00275   | <b>2.99E-02</b> | rs2297615   | 0.00489   | 1.51E-01        | rs13270719  | 0.006286  | 1.46E-01        | rs72474209  | 0.00186   |
| 29929   | ALG6     | 1   | 63813260        | 63924233      | 1p31.3        | N-glycan             | <b>3.10E-02</b>   | rs11208186  | 0.002939  | 1.47E-01        | rs74693182  | 0.005242  | 8.59E-02        | rs75284175  | 0.002418  | 5.34E-01        | rs10789135  | 0.01476   |
| 9334    | B4GALT5  | 20  | 48229482        | 48350421      | 20q13.1-q13.2 | other poly           | <b>3.13E-02</b>   | rs803192    | 0.003489  | 2.89E-01        | rs6095639   | 0.02753   | 3.10E-01        | rs3888385   | 0.04511   | 5.68E-01        | rs6067211   | 0.005355  |
| 4791    | NFKB2    | 10  | 104133866       | 104182286     | 10q24         | NFKB                 | <b>3.16E-02</b>   | rs12360330  | 0.003212  | 4.72E-01        | rs78145470  | 0.02818   | 9.39E-02        | rs78145470  | 0.0005606 | 2.01E-01        | rs7921001   | 0.02692   |
| 7903    | ST8SIA4  | 5   | 100122638       | 100258999     | 5q21          | other poly           | <b>3.47E-02</b>   | rs10515305  | 0.002357  | 5.92E-02        | rs157181    | 0.02415   | 1.04E-01        | rs62386110  | 0.007817  | 1.22E-01        | rs10515305  | 0.006955  |
| 51363   | CHST15   | 10  | 125747181       | 125873123     | 10q26         | other poly           | <b>3.48E-02</b>   | rs141611516 | 0.0007695 | <b>1.79E-03</b> | rs141611516 | 2.94E-05  | <b>2.69E-02</b> | rs141611516 | 0.0004263 | 2.82E-01        | rs187109891 | 0.00103   |
| 201595  | STT3B    | 3   | 31554490        | 31697556      | 3p23          | N-glycan             | <b>3.56E-02</b>   | rs12107675  | 0.002775  | <b>7.67E-03</b> | rs12107675  | 0.0008816 | <b>5.97E-03</b> | rs62236739  | 0.0004898 | 1.82E-01        | rs116764639 | 0.001667  |
| 405     | ARNT     | 1   | 150762180       | 150869244     | 1q21          | CYP1A2               | <b>3.61E-02</b>   | rs191784961 | 0.002398  | 1.10E-01        | rs115298177 | 0.003178  | 2.04E-01        | rs10305665  | 0.023     | 1.62E-01        | rs10305660  | 0.00768   |
| 64409   | WBSR17   | 7   | 70577522        | 71198586      | 7q11.23       | other poly           | <b>3.84E-02</b>   | rs4129606   | 0.0001379 | 1.24E-01        | rs34628923  | 0.0008249 | 8.39E-02        | rs183213541 | 0.00306   | <b>5.60E-03</b> | rs7786589   | 0.002187  |
| 8600    | TNFSF11  | 13  | 43116871        | 43202149      | 13q14         | NFKB                 | <b>3.99E-02</b>   | rs138818878 | 0.00465   | 2.03E-01        | rs61959536  | 0.005046  | 1.07E-01        | rs9533138   | 0.006197  | <b>1.11E-02</b> | rs9533138   | 0.002634  |
| 199857  | ALG14    | 1   | 95428278        | 95558507      | 1p21.3        | N-glycan,other poly  | <b>4.45E-02</b>   | rs2766002   | 0.000132  | 5.00E-01        | rs116423542 | 0.01969   | 2.15E-01        | rs2766002   | 0.001347  | <b>3.62E-02</b> | rs61772636  | 0.0007372 |
| 79092   | CARD14   | 17  | 78123790        | 78203130      | 17q25         | NFKB                 | <b>4.86E-02</b>   | rs118157584 | 0.0006827 | <b>5.47E-03</b> | rs68089445  | 0.001336  | <b>2.18E-02</b> | rs55831872  | 0.001845  | 3.19E-01        | rs4889992   | 0.004604  |
| 3576    | CXCL8    | 4   | 74586222        | 74629433      | 4q13-q21      | NFKB                 | 5.02E-02          | rs138840656 | 0.007181  | 8.69E-02        | rs72650806  | 0.004046  | <b>3.85E-02</b> | rs138840656 | 0.01109   | <b>2.58E-02</b> | rs78386414  | 7.22E-05  |
| 4793    | NFKB1B   | 19  | 39370339        | 39419534      | 19q13.1       | NFKB                 | 5.10E-02          | rs11879029  | 0.001765  | <b>4.80E-02</b> | rs17134180  | 0.006809  | 7.59E-02        | rs7251489   | 0.003867  | <b>4.78E-03</b> | rs11672849  | 7.94E-05  |
| 2799    | GNS      | 12  | 65087221        | 65173226      | 12q14         | other poly           | 6.14E-02          | rs2682728   | 0.01025   | <b>4.19E-02</b> | rs1245182   | 0.002596  | <b>1.32E-02</b> | rs1797690   | 0.00119   | 8.89E-02        | rs1797687   | 0.0006847 |
| 6482    | ST3GAL1  | 8   | 134447090       | 134604183     | 8q24.22       | other poly           | 6.39E-02          | rs68108857  | 0.0005574 | <b>2.25E-02</b> | rs74513215  | 0.0005742 | 5.24E-02        | rs72718267  | 0.001326  | 7.69E-02        | rs2975738   | 0.007499  |
| 7186    | TRAF2    | 9   | 139760964       | 139841067     | 9q34          | NFKB                 | 6.75E-02          | rs36097075  | 0.004255  | <b>1.28E-02</b> | rs35692357  | 0.002579  | 8.09E-02        | rs35692357  | 0.01053   | 5.34E-01        | rs146586056 | 0.01938   |
| 54658   | UGT1A1   | 2   | 234648918       | 234701945     | 2q37          | other poly           | 7.09E-02          | rs28900435  | 0.002424  | 9.29E-02        | rs6431637   | 0.001441  | 1.53E-01        | rs6431637   | 0.000124  | <b>3.39E-02</b> | rs56148057  | 0.0009802 |
| 338596  | ST8SIA6  | 10  | 173162780       | 17516254      | 10p12.33      | other poly           | 7.09E-02          | rs10159766  | 0.001044  | 2.12E-01        | rs11254579  | 0.005046  | 1.33E-01        | rs11254625  | 0.007069  | <b>2.12E-02</b> | rs17445461  | 0.002729  |
| 1553    | CYP2A13  | 19  | 41574355        | 41622100      | 19q13.2       | xeno,nicotine        | 7.19E-02          | rs146866989 | 0.001283  | 8.79E-02        | rs149767102 | 0.0002461 | 5.01E-01        | rs149767102 | 0.003746  | <b>9.70E-03</b> | rs117668555 | 0.0002865 |
| 2328    | FMO3     | 1   | 171040017       | 171106959     | 1q24.3        | xeno,drug            | 8.09E-02          | rs76012774  | 0.002051  | 8.59E-02        | rs76012774  | 0.000188  | <b>2.31E-02</b> | rs76012774  | 2.53E-05  | <b>8.03E-03</b> | rs12404183  | 0.000121  |
| 10891   | PPARGC1A | 4   | 23773643        | 23911700      | 4p15.1        | CYP1A2               | 8.19E-02          | rs17885261  | 0.0003171 | 1.42E-01        | rs7813533   | 0.001855  | 5.66E-02        | rs75901901  | 0.001919  | <b>1.85E-02</b> | rs1532196   | 0.004008  |
| 8767    | RIPK2    | 8   | 90749974        | 90823292      | 8q21          | NFKB                 | 8.19E-02          | rs11995065  | 0.01102   | 3.03E-01        | rs117152341 | 0.01693   | 4.10E-01        | rs11783881  | 0.01661   | <b>1.39E-02</b> | rs36032938  | 0.00144   |
| 2327    | FMO2     | 1   | 171134387       | 171201822     | 1q24.3        | xeno,drug            | 9.09E-02          | rs76012774  | 0.002051  | 2.21E-01        | rs76012774  | 0.000188  | <b>3.81E-02</b> | rs76012774  | 2.53E-05  | 7.19E-02        | rs1795243   | 0.002214  |
| 316     | AOX1     | 2   | 201430730       | 201556217     | 2q33          | xeno                 | 1.02E-01          | rs6735028   | 0.002098  | 1.84E-01        | rs34771762  | 0.007149  | 2.40E-01        | rs11896227  | 0.009782  | <b>3.07E-02</b> | rs7589108   | 0.0002403 |
| 1572    | CYP2F1   | 19  | 41603552        | 41654281      | 19q13.2       | nicotine             | 1.03E-01          | rs75762823  | 0.007067  | 1.10E-01        | rs149767102 | 0.0002461 | 6.03E-01        | rs149767102 | 0.003746  | <b>4.09E-02</b> | rs74319726  | 0.00101   |
| 9348    | NDST3    | 4   | 118935499       | 119199789     | 4q26          | other poly           | 1.06E-01          | rs131355500 | 0.006294  | 2.78E-01        | rs6842524   | 0.02329   | <b>3.10E-02</b> | rs7656160   | 0.004027  | 5.19E-02        | rs76090359  | 0.003326  |
| 5971    | RELB     | 19  | 45484706        | 45561456      | 19q13.32      | NFKB                 | 1.08E-01          | rs204473    | 0.01083   | <b>4.65E-02</b> | rs75824242  | 0.0007415 | 1.87E-01        | rs11879248  | 0.003129  | 4.00E-01        | rs28809016  | 0.02314   |
| 79053   | ALG8     | 11  | 77791987        | 77870699      | 11q14.1       | N-glycan             | 1.08E-01          | rs7125563   | 0.00962   | 5.71E-02        | rs113390    |           |                 |             |           |                 |             |           |

Figure S1. GWAS of plasma caffeine (137X)

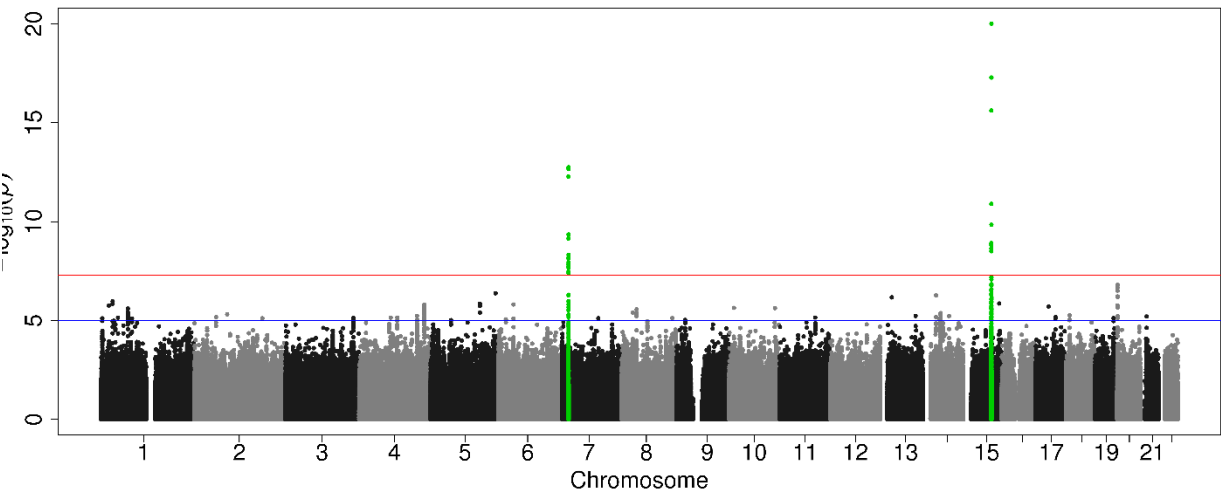

Figure S2. GWAS of plasma paraxanthine (17X)

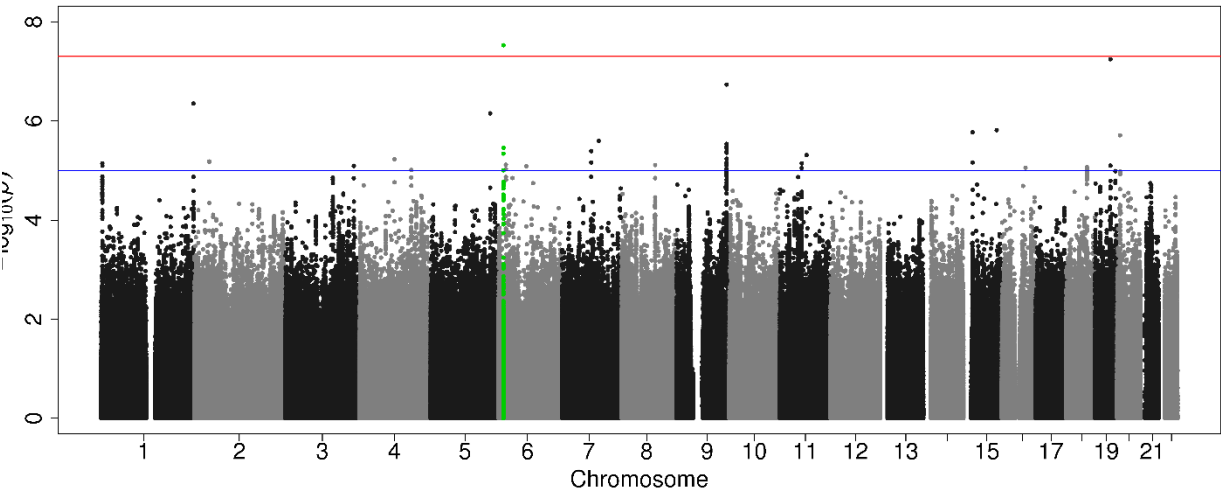

Figure S3. GWAS of plasma theophylline (13X)

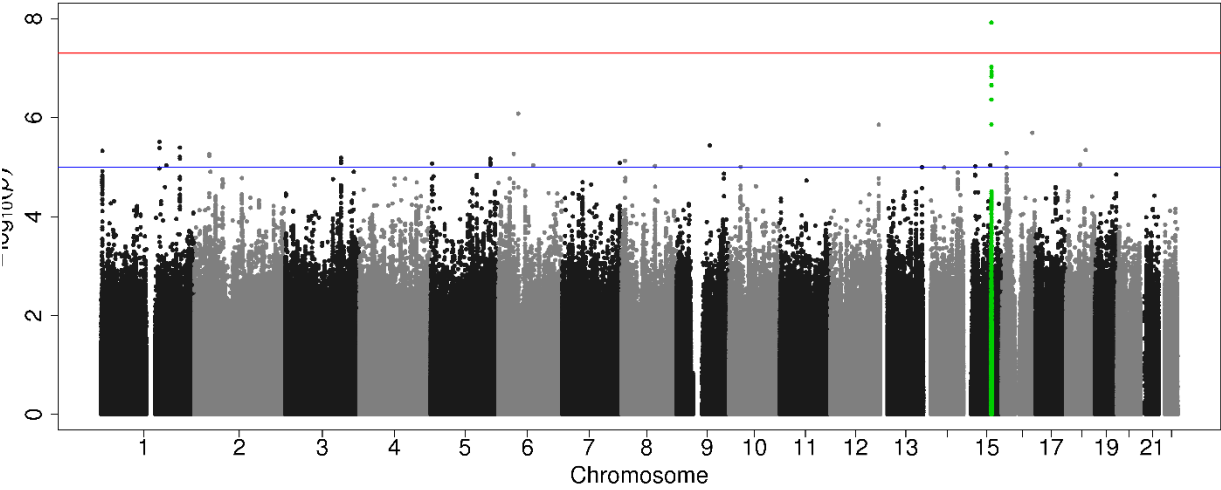

Figure S4. GWAS of plasma theobromine (37X)

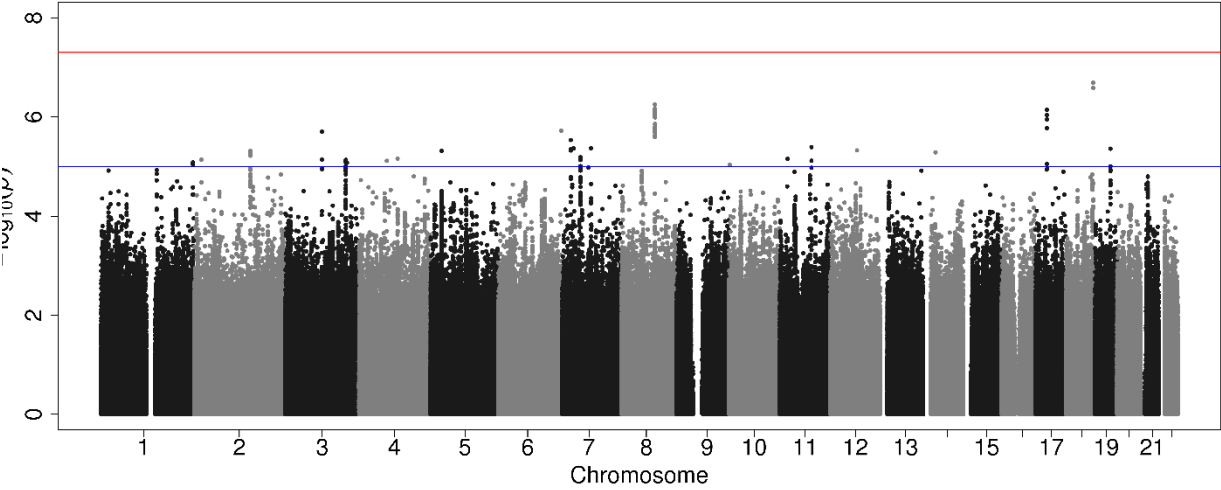

Figure S5. GWAS of plasma 1,3,7 trimethyluric acid (137U)

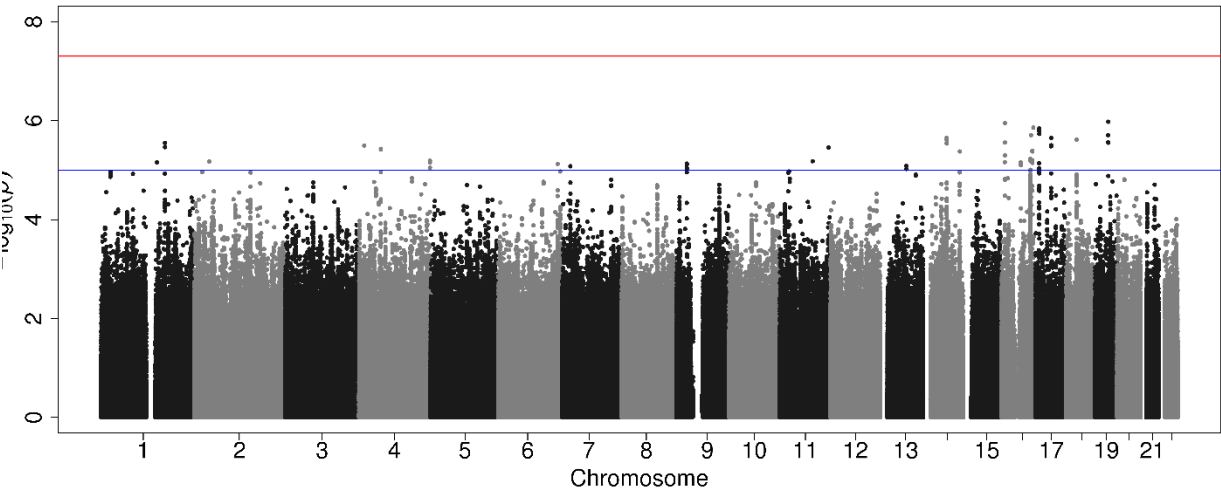

Figure S6. GWAS of paraxanthine/caffeine (17X/137X)

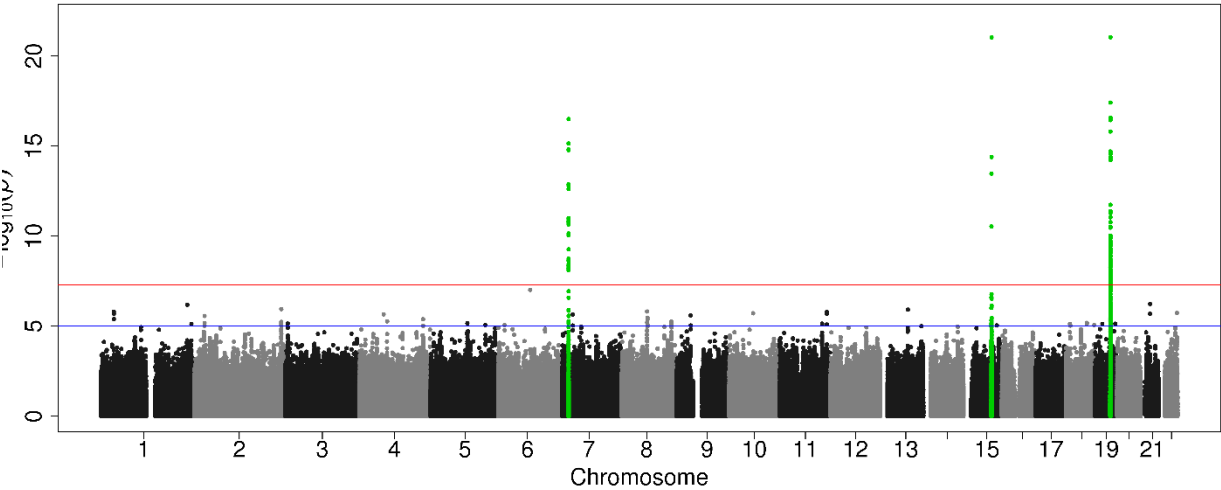

Figure S7. QQ-plots of plasma metabolite GWAS

a. 137X

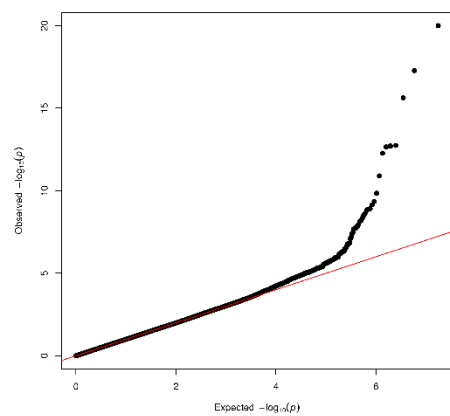

b. 17X

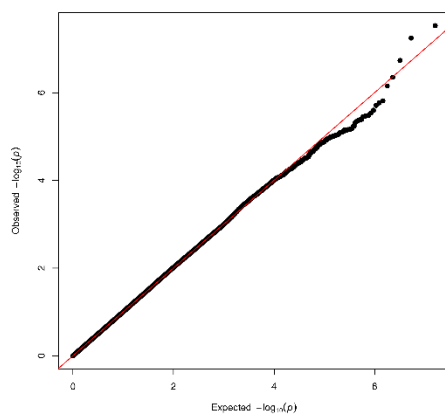

c. 13X

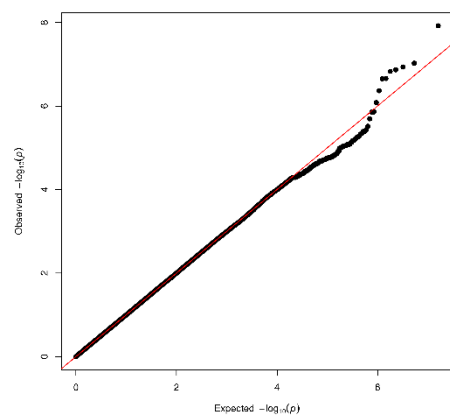

d. 37X

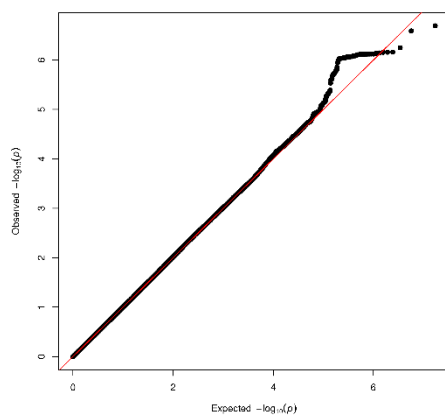

e. 137U

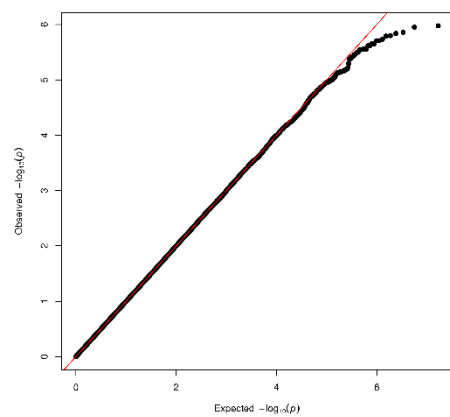

f. 17X/137X

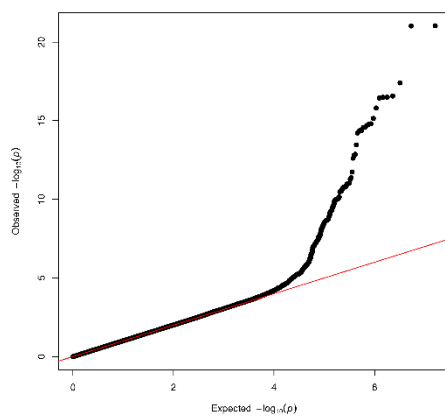

Figure S8. Regional Association Plots

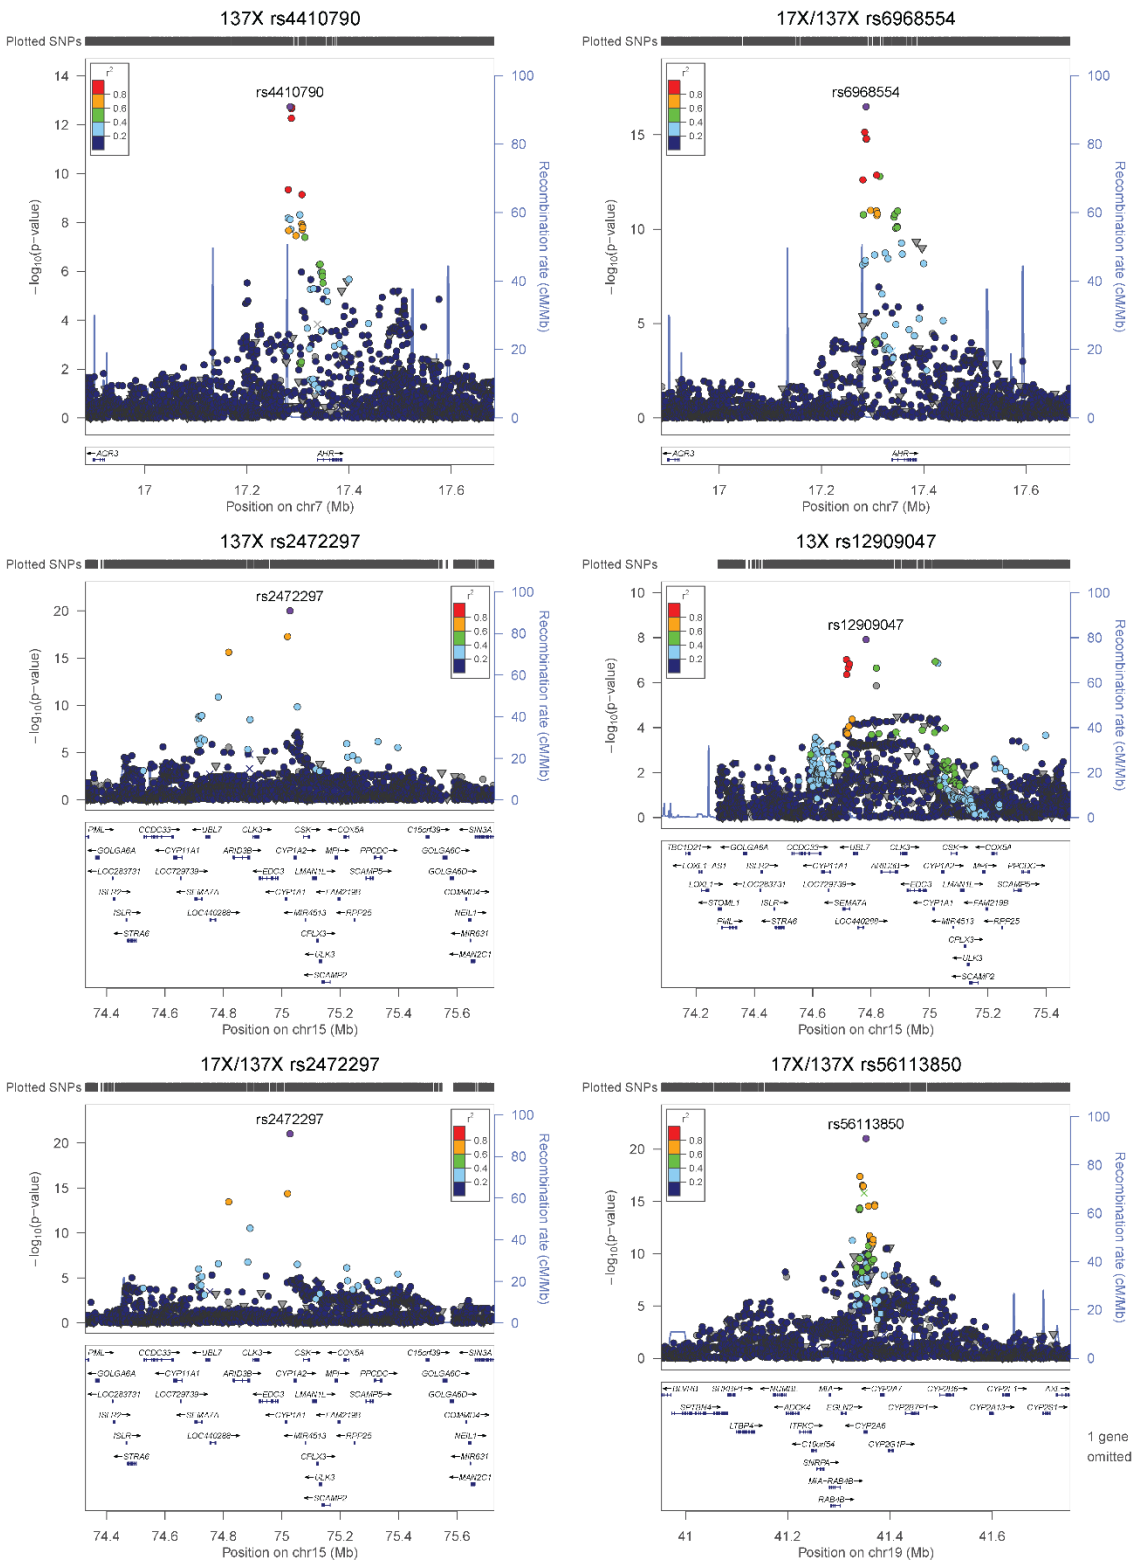

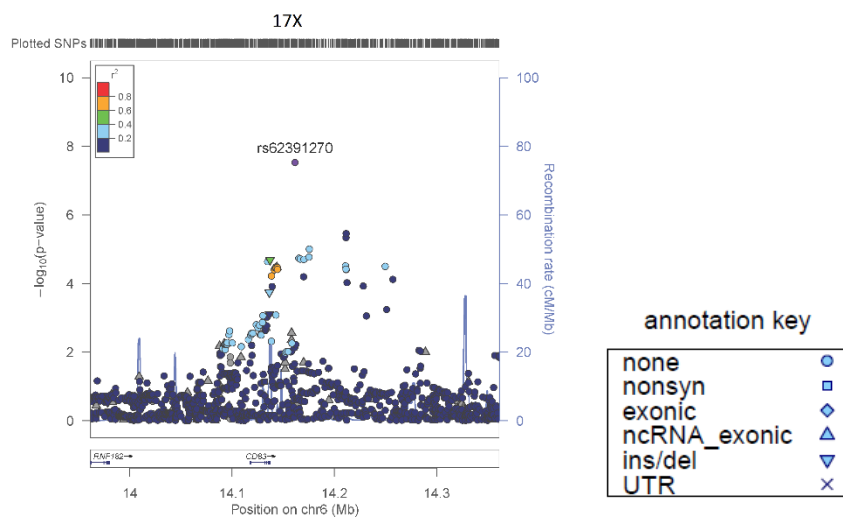



Table S9 Top Gene-based Tests (P<0.05)

| Gene.ID | Gene     | Chr | Gene start (kb) | Gene end (kb) | Locus         | Pathway <sup>a</sup>          | 137X <sup>b</sup> |             |           | 17X             |             |            | 13X             |                 |            | 17X/137X        |                 |           |          |
|---------|----------|-----|-----------------|---------------|---------------|-------------------------------|-------------------|-------------|-----------|-----------------|-------------|------------|-----------------|-----------------|------------|-----------------|-----------------|-----------|----------|
|         |          |     |                 |               |               |                               | Gene-based P      | Top SNP     | Top SNP P | Gene-based P    | Top SNP     | Top SNP P  | Gene-based P    | Top SNP         | Top SNP P  | Gene-based P    | Top SNP         | Top SNP P |          |
| 1543    | CYP1A1   | 15  | 74991882        | 75037877      | 15q24.1       | nicotine,drug,CYP1A2          | <b>1.00E-06</b>   | rs2472297   | 1.00E-20  | <b>1.69E-02</b> | rs2470893   | 0.0002969  | <b>1.44E-04</b> | rs2470893       | 1.16E-07   | <b>2.00E-06</b> | rs2472297       | 9.45E-22  |          |
| 1544    | CYP1A2   | 15  | 75021183        | 75068941      | 15q24.1       | nicotine,drug,CYP1A2,caffeine | <b>1.00E-06</b>   | rs2472297   | 1.00E-20  | <b>2.63E-02</b> | rs2470893   | 0.0002969  | <b>4.62E-04</b> | rs2470893       | 1.16E-07   | <b>3.00E-06</b> | rs2472297       | 9.45E-22  |          |
| 196     | AHR      | 7   | 17318275        | 17405775      | 7p15          | CYP1A2                        | <b>3.00E-06</b>   | rs2389763   | 7.17E-10  |                 | 2.34E-01    | rs73079637 | 0.01156         | <b>6.74E-03</b> | rs10275488 | 0.0005489       | <b>1.00E-06</b> | rs2389763 | 1.36E-13 |
| 5530    | PPP3CA   | 4   | 101924586       | 102288628     | 4q24          | other poly                    | <b>7.59E-04</b>   | rs10516471  | 7.09E-06  | 1.91E-01        | rs13121347  | 0.0113     | 9.09E-02        | rs10516471      | 0.00612    | 2.14E-01        | rs74351276      | 0.0137    |          |
| 10195   | ALG3     | 3   | 183940116       | 183987313     | 3q27.1        | N-glycan,other poly           | <b>1.10E-03</b>   | rs112813049 | 0.0002055 | <b>5.22E-04</b> | rs6806162   | 4.25E-05   | <b>1.31E-03</b> | rs71318361      | 0.0002677  | 3.48E-01        | rs3892286       | 0.008539  |          |
| 11253   | MAN1B1   | 9   | 139961378       | 140023639     | 9q34          | N-glycan,other poly           | <b>3.73E-03</b>   | rs10870198  | 5.33E-05  | 1.24E-01        | rs11146019  | 0.007926   | 2.85E-01        | rs11146019      | 0.01016    | 4.32E-01        | rs185925877     | 0.03007   |          |
| 2131    | EXT1     | 8   | 118791601       | 119144058     | 8q24.11       | other poly                    | <b>3.99E-03</b>   | rs1824175   | 0.0001558 | 9.59E-02        | rs17431672  | 0.000396   | <b>4.90E-02</b> | rs17431672      | 0.004843   | 2.88E-01        | rs148506839     | 0.008394  |          |
| 4122    | MAN2A2   | 15  | 91427419        | 91485815      | 15q26.1       | N-glycan                      | <b>4.09E-03</b>   | rs11073963  | 0.0002156 | 7.19E-02        | rs79742014  | 0.000467   | 5.79E-02        | rs78164913      | 0.0002781  | 1.70E-01        | rs79742014      | 0.01599   |          |
| 6489    | ST8SIA1  | 12  | 22326324        | 22507648      | 12p12.1-p11.2 | other poly                    | <b>6.94E-03</b>   | rs2072542   | 0.0009769 | 8.89E-02        | rs976711    | 0.002266   | 5.08E-01        | rs75130288      | 0.02272    | 2.22E-01        | rs75130288      | 0.008085  |          |
| 9956    | HS3ST2   | 16  | 22805859        | 22947659      | 16p12         | other poly                    | <b>7.12E-03</b>   | rs9302402   | 0.0005735 | <b>3.94E-03</b> | rs756800    | 0.0007964  | <b>4.42E-02</b> | rs73543184      | 0.0004082  | 1.98E-01        | rs71378487      | 0.009431  |          |
| 2590    | GALNT2   | 1   | 230173535       | 230437876     | 1q41-q42      | other poly                    | <b>7.89E-03</b>   | rs10864696  | 5.67E-05  | <b>4.23E-02</b> | rs6659554   | 0.0006264  | <b>9.30E-03</b> | rs12733702      | 0.0002905  | 1.25E-01        | rs74145438      | 0.001859  |          |
| 57452   | GALNT16  | 14  | 69706680        | 69841190      | 14q24.1       | other poly                    | <b>8.90E-03</b>   | rs140734049 | 0.0006341 | <b>4.36E-03</b> | rs76314768  | 0.0004334  | 5.73E-02        | rs116398598     | 0.003224   | 2.63E-01        | rs4271533       | 0.005408  |          |
| 8509    | NDST2    | 10  | 75591668        | 75591589      | 10q22         | other poly                    | <b>1.03E-02</b>   | rs2675662   | 0.0013    | 1.69E-01        | rs35972789  | 0.02259    | 2.04E-01        | rs35972789      | 0.0292     | 2.34E-01        | rs35207902      | 0.007145  |          |
| 55907   | CMAS     | 12  | 22179109        | 22238606      | 12p12.1       | other poly                    | <b>1.09E-02</b>   | rs3809205   | 0.0001651 | <b>2.41E-02</b> | rs10743430  | 0.003115   | <b>2.26E-02</b> | rs10770876      | 0.00282    | 4.12E-01        | rs3809204       | 0.025     |          |
| 6927    | HNFI A   | 12  | 121396548       | 121460314     | 12q24.2       | CYP1A2                        | <b>1.47E-02</b>   | rs11065381  | 0.0006045 | 1.60E-01        | rs78197988  | 0.008192   | 2.19E-01        | rs78671297      | 0.00549    | 3.92E-01        | rs7969196       | 0.01252   |          |
| 3036    | HAS1     | 19  | 52196364        | 52247221      | 19q13.4       | other poly                    | <b>1.77E-02</b>   | rs75310023  | 4.40E-05  | 3.98E-01        | rs10408866  | 0.0293     | 1.13E-01        | rs3829652       | 0.00439    | 5.37E-02        | rs4802856       | 0.001241  |          |
| 50614   | GALNT9   | 12  | 132660916       | 132925905     | 12q24.33      | other poly                    | <b>2.19E-02</b>   | rs28437244  | 0.0006187 | <b>2.05E-02</b> | rs28421288  | 9.63E-05   | 8.79E-02        | rs28735021      | 0.006779   | 1.60E-01        | rs61945704      | 0.005272  |          |
| 440138  | ALG11    | 13  | 52566522        | 52623780      | 13q14.2       | N-glycan,other poly           | <b>2.21E-02</b>   | rs61958804  | 0.004195  | 8.87E-01        | rs73184327  | 0.1454     | 1.46E-01        | rs56219214      | 0.009037   | 6.82E-01        | rs117014324     | 0.0969    |          |
| 2683    | B4GALT1  | 9   | 33090638        | 33187356      | 9p13          | N-glycan,other poly           | <b>2.27E-02</b>   | rs146570729 | 0.0001358 | <b>2.42E-03</b> | rs62544388  | 5.64E-05   | <b>3.46E-02</b> | rs874202        | 0.0004913  | 8.09E-02        | rs7380500       | 0.007483  |          |
| 8813    | DPM1     | 20  | 49531404        | 49595060      | 20q13.13      | N-glycan                      | <b>2.31E-02</b>   | rs142825371 | 0.0006431 | 1.75E-01        | rs4809815   | 0.0178     | 1.01E-01        | rs6096207       | 0.02281    | 1.52E-01        | rs910074        | 0.02171   |          |
| 8702    | B4GALT4  | 3   | 118910588       | 118979752     | 3q13.3        | other poly                    | <b>2.36E-02</b>   | rs58488777  | 0.002003  | 1.07E-01        | rs149996849 | 0.008004   | 1.14E-01        | rs58488777      | 0.003747   | 3.64E-01        | rs75951664      | 0.007496  |          |
| 3551    | IKBK B   | 8   | 42108819        | 42210171      | 8p11.2        | NFKB                          | <b>2.99E-03</b>   | rs13270748  | 0.00275   | <b>2.99E-02</b> | rs2272615   | 0.00489    | 1.51E-01        | rs13270719      | 0.006286   | 1.46E-01        | rs72474209      | 0.0186    |          |
| 29929   | ALG6     | 1   | 63813260        | 63924233      | 1p31.3        | N-glycan                      | <b>3.10E-02</b>   | rs11208186  | 0.002939  | 1.47E-01        | rs74693182  | 0.005242   | 8.59E-02        | rs75284175      | 0.002418   | 5.34E-01        | rs10789135      | 0.01476   |          |
| 9334    | B4GALT5  | 20  | 48229482        | 48350421      | 20q13.1-q13.2 | other poly                    | <b>3.13E-02</b>   | rs803192    | 0.003489  | 2.89E-01        | rs6095639   | 0.02753    | 3.10E-01        | rs3888385       | 0.04511    | 5.68E-01        | rs6067211       | 0.005355  |          |
| 4791    | NFKB2    | 10  | 104133866       | 104182286     | 10q24         | NFKB                          | <b>3.16E-02</b>   | rs12360330  | 0.003212  | 4.72E-01        | rs78145470  | 0.02818    | 9.39E-02        | rs78145470      | 0.0005606  | 2.01E-01        | rs7921010       | 0.02692   |          |
| 7903    | ST8SIA4  | 5   | 100122638       | 100258989     | 5q21          | other poly                    | <b>3.47E-02</b>   | rs10515305  | 0.002357  | 5.92E-02        | rs157181    | 0.02415    | 1.04E-01        | rs62386110      | 0.007817   | 1.22E-01        | rs10515305      | 0.006955  |          |
| 51363   | CHST15   | 10  | 125747181       | 125873123     | 10q26         | other poly                    | <b>3.48E-02</b>   | rs141611516 | 0.0007695 | <b>1.79E-03</b> | rs141611516 | 2.94E-05   | <b>2.69E-02</b> | rs141611516     | 0.0004263  | 2.82E-01        | rs187109891     | 0.00103   |          |
| 201595  | STT3B    | 3   | 31554490        | 31697556      | 3p23          | N-glycan                      | <b>3.56E-02</b>   | rs12107675  | 0.002775  | <b>7.67E-03</b> | rs12107675  | 0.0008816  | <b>5.97E-03</b> | rs62236739      | 0.0004898  | 1.82E-01        | rs116764639     | 0.001667  |          |
| 405     | ARNT     | 1   | 150762180       | 150869244     | 1q21          | CYP1A2                        | <b>3.61E-02</b>   | rs191784961 | 0.002398  | 1.10E-01        | rs115298177 | 0.003178   | 2.04E-01        | rs10305665      | 0.023      | 1.62E-01        | rs10305660      | 0.00768   |          |
| 64409   | WBSCR17  | 7   | 70577522        | 71198586      | 7q11.23       | other poly                    | <b>3.84E-02</b>   | rs1429606   | 0.0001379 | 1.24E-01        | rs34628923  | 0.0008249  | 8.39E-02        | rs183213541     | 0.00306    | <b>5.60E-03</b> | rs7786589       | 0.002187  |          |
| 8600    | TNFSF11  | 13  | 43116871        | 43202149      | 13q14         | NFKB                          | <b>3.99E-02</b>   | rs138818878 | 0.000465  | 2.03E-01        | rs61959536  | 0.005046   | 1.07E-01        | rs9533138       | 0.006197   | <b>1.11E-02</b> | rs95331384      | 0.002634  |          |
| 199857  | ALG14    | 1   | 95428278        | 95558507      | 1p21.3        | N-glycan,other poly           | <b>4.45E-02</b>   | rs2766002   | 0.000132  | 5.00E-01        | rs116423542 | 0.01969    | 2.15E-01        | rs2766002       | 0.001347   | <b>3.62E-02</b> | rs61772636      | 0.0007372 |          |
| 79092   | CARD14   | 17  | 78123790        | 78203130      | 17q25         | NFKB                          | <b>4.86E-02</b>   | rs118157584 | 0.0006827 | <b>5.47E-03</b> | rs68089445  | 0.001336   | <b>2.18E-02</b> | rs55831872      | 0.001845   | 3.19E-01        | rs4889992       | 0.004604  |          |
| 3576    | CXCL8    | 4   | 74586222        | 74629433      | 4q13-q21      | NFKB                          | 5.02E-02          | rs138840656 | 0.007181  | 8.69E-02        | rs72650806  | 0.004046   | <b>3.85E-02</b> | rs138840656     | 0.01109    | <b>2.58E-02</b> | rs78386414      | 7.22E-05  |          |
| 4793    | NFKB1B   | 19  | 39370339        | 39419534      | 19q13.1       | NFKB                          | 5.10E-02          | rs11879029  | 0.001765  | <b>4.80E-02</b> | rs1134180   | 0.006809   | 7.59E-02        | rs11672849      | 0.003867   | <b>4.78E-03</b> | rs11672849      | 7.94E-05  |          |
| 2799    | GNS      | 12  | 65087221        | 65173226      | 12q14         | other poly                    | 6.14E-02          | rs2682728   | 0.01025   | <b>4.19E-02</b> | rs1245182   | 0.002596   | <b>1.32E-02</b> | rs1797690       | 0.00119    | 8.89E-02        | rs1797687       | 0.0006847 |          |
| 6482    | ST3GAL1  | 8   | 134447090       | 134604183     | 8q24.22       | other poly                    | 6.39E-02          | rs68108857  | 0.0005574 | <b>2.25E-02</b> | rs74513215  | 0.0005742  | 5.24E-02        | rs72718267      | 0.001326   | 7.69E-02        | rs2975738       | 0.007499  |          |
| 7186    | TRAF2    | 9   | 139760964       | 139841067     | 9q34          | NFKB                          | 6.75E-02          | rs36097075  | 0.004255  | <b>1.28E-02</b> | rs35692357  | 0.002379   | 8.09E-02        | rs35692357      | 0.01053    | 5.34E-01        | rs146586056     | 0.01938   |          |
| 54658   | UGT1A1   | 2   | 234648918       | 234701945     | 2q37          | other poly                    | 7.09E-02          | rs28900435  | 0.002424  | 9.29E-02        | rs6431637   | 0.001441   | 1.53E-01        | rs6431637       | 0.000124   | <b>3.39E-02</b> | rs56148057      | 0.0009802 |          |
| 338596  | ST8SIA6  | 10  | 17342675        | 17516254      | 10p12.33      | other poly                    | 7.09E-02          | rs10159766  | 0.001044  | 2.12E-01        | rs711254579 | 0.007891   | 1.33E-01        | rs11254625      | 0.007069   | <b>2.12E-02</b> | rs71445461      | 0.002729  |          |
| 1553    | CYP2A13  | 19  | 41574355        | 41622100      | 19q13.2       | xeno,nicotine                 | 7.19E-02          | rs146866981 | 0.001283  | 8.79E-02        | rs149767102 | 0.0002461  | 5.01E-01        | rs149767102     | 0.003746   | <b>9.70E-03</b> | rs117668555     | 0.0002865 |          |
| 2328    | FMO3     | 1   | 171040017       | 171106959     | 1q24.3        | xeno,drug                     | 8.09E-02          | rs76012774  | 0.000188  | 8.59E-02        | rs76012774  | 0.000188   | <b>2.31E-02</b> | rs76012774      | 2.53E-05   | <b>8.03E-03</b> | rs12404183      | 0.000121  |          |
| 10891   | PPARGC1A | 4   | 23773643        | 23911700      | 4p15.1        | CYP1A2                        | 8.19E-02          | rs17885261  | 0.0003171 | 1.42E-01        | rs1873533   | 0.001855   | 5.66E-02        | rs75901901      | 0.001919   | <b>1.85E-02</b> | rs1532196       | 0.004008  |          |
| 8767    | RIPK2    | 8   | 90749974        | 90823292      | 8q21          | NFKB                          | 8.19E-02          | rs11995065  | 0.01102   | 3.03E-01        | rs117152341 | 0.01693    | 4.10E-01        | rs11783881      | 0.01661    | <b>1.39E-02</b> | rs36032938      | 0.00144   |          |
| 2327    | FMO2     | 1   | 171134387       | 171201822     | 1q24.3        | xeno,drug                     | 9.09E-02          | rs76012774  | 0.002051  | 2.21E-01        | rs76012774  | 0.000188   | <b>3.81E-02</b> | rs76012774      | 2.53E-05   | 7.19E-02        | rs1795243       | 0.002214  |          |
| 316     | AOX1     | 2   | 201430730       | 201556217     | 2q33          | xeno                          | 1.02E-01          | rs6735028   | 0.002098  | 1.84E-01        | rs34771762  | 0.007149   | 2.40E-01        | rs11896227      | 0.009782   | <b>3.07E-02</b> | rs7589108       | 0.0002403 |          |
| 1572    | CYP2F1   | 19  | 41600352        | 41654281      | 19q13.2       | nicotine                      | 1.03E-01          | rs75762823  | 0.007067  | 1.10E-01        | rs149767102 | 0.0002461  | 6.03E-01        | rs149767102     | 0.003746   | <b>4.09E-02</b> | rs74319726      | 0.00101   |          |
| 9348    | NDST3    | 4   | 118935499       | 119199789     | 4q26          | other poly                    | 1.06E-01          | rs131355500 | 0.006294  | 2.78E-01        | rs6842524   | 0.02329    | <b>3.10E-02</b> | rs7656160       | 0.004027   | 5.19E-02        | rs76090359      | 0.003326  |          |
| 5971    | RELB     | 19  | 45484706        | 45561456      | 19q13.32      | NFKB                          | 1.08E-01          | rs204473    | 0.01083   | <b>4.65E-02</b> | rs78824242  | 0.0007415  | 1.87E-01        | rs11879248      | 0.003129   | 4.00E-01        | rs28809016      | 0.02314   |          |
| 79053   | ALG8     | 11  | 77791987        | 77870699      | 11q14.1       | N-glycan                      | 1.08E-01          | rs1215563   | 0.00962   | 5.71E-02        |             |            |                 |                 |            |                 |                 |           |          |
